# Supplementary material
Source: publisher figshare collection journal article supplement (https://acs.figshare.com/ndownloader/files/11428892)
Supplement: Supplementary file 1 [file 11428892]

## **Detection of Lung Cancer: Concomitant Volatile Organic Compounds and Metabolomics profiling of six cancer cell lines of different histological origins**

Zhunan Jia<sup>1,2</sup>, Hui Zhang<sup>3</sup>, Choon Nam Ong<sup>3,4,\*</sup>, Abhijeet Patra<sup>1,2</sup>, Yonghai Lu<sup>4</sup>, Chwee Teck Lim<sup>2,5,6</sup>, Thirumalai Venkatesan<sup>1,2,7,8,9,\*</sup>

<sup>1</sup> NUSNNI-Nanocore, National University of Singapore, 5A Engineering Drive 1, 117411, Singapore

<sup>2</sup> NUS Graduate School for Integrative Sciences and Engineering, National University of Singapore, 28 Medical Drive, 117456, Singapore

<sup>3</sup> NUS Environmental Research Institute, National University of Singapore, 5A Engineering Drive 1, 117411 Singapore

<sup>4</sup> Saw Swee Hock School of Public Health, National University of Singapore, 12 Science Drive 2, 117549, Singapore

<sup>5</sup> Department of Biomedical Engineering, 9 Engineering Drive 1, National University of Singapore, 117575, Singapore

<sup>6</sup> Mechanobiology Institute, National University of Singapore, 5A Engineering Drive 1, 117411, Singapore

<sup>7</sup> Department of Electrical Engineering, National University of Singapore, 4 Engineering Drive 3, 117583, Singapore

<sup>8</sup> Department of Materials Science and Engineering, National University of Singapore, 9 Engineering Drive 1, 117574, Singapore

<sup>9</sup> Department of Physics, National University of Singapore, 2 Science Drive 3, 117551, Singapore

\*correspondence: venky@nus.edu.sg, ephocn@nus.edu.sg

Key words: Volatile organic compound; Metabolomics; Lung cancer; Histology; GC-Q-TOF/MS

### **Disclosure of Potential Conflicts of Interest**

No potential conflicts of interest were disclosed.

## Table Captions

**Table S1.** m/z, CAS number, and retention time of 20 statistically differential VOCs.

**Table S2.** Comparison of match, reverse match and probability scores of the 13 VOCs confirmed with standards.

**Table S3.** Retention time and m/z values of 37 statistically differential non-volatile metabolites.

**Table S4.** Comparison of match, reverse match and probability scores of the 20 non-volatile metabolites confirmed with standards.

## Figure Captions

**Figure S1.** Morphology of eight lung cell lines when cultured in supplier recommended medium

**Figure S2.** PCA score plot of metabolites profiling shows QC samples are clustered together.

**Figure S3.** Features detected in blank SPME fiber. (TIC chromatogram with labelled compound ID, followed with a table showing the retention time, mass, compound, CAS number, match score, reverse match score and probability of each peak.)

**Figure S4.** TIC of 20 VOCs in representative samples.

**Figure S5.** TIC of 37 non-volatile metabolites in representative samples

**Figure S6.** Parallel comparison of spectrums of 13 VOCs in sample and in standards. (Spectrum of standard is in red, spectrum of sample is in black)

**Figure S7.** Parallel comparison of spectrums of 20 non-volatile metabolites in sample and in standards. (Spectrum of standard is in red, spectrum of sample is in black)

**Figure S8.** ROC analysis of a) cancer vs normal cell b) large cell vs. other NSCLC. c) SCLC vs NSCLC

**Table S1.** m/z, CAS number, and retention time of 20 statistically differential VOCs.

| <b>m/z</b> | <b>CAS</b>        | <b>Retention Time (min)</b> | <b>Compound</b>                      |
|------------|-------------------|-----------------------------|--------------------------------------|
| 57.0685    | 123-38-6          | 1.6                         | Propanal                             |
| 58.0387    | 67-64-1           | 1.62                        | Acetone                              |
| 45.03243   | 78-92-2           | 1.64                        | 2-Butanol                            |
| 71.0826    | 107-83-5          | 1.87                        | Pentane,2-methyl                     |
| 91.05265   | 108-88-3          | 4.59                        | Toluene                              |
| 83.04758   | 625-65-0          | 5.5                         | 2-Pentene, 2,4-dimethyl-             |
| 56.0998    | 66-25-1           | 5.61                        | Hexanal                              |
| 91.05268   | 100-41-4          | 7.54                        | Ethylbenzene                         |
| 91.05264   | 95-47-6           | 7.86                        | o-xylene                             |
| 91.0571    | 108-38-3,106-42-3 | 7.92                        | m & p-Xylene                         |
| 57.03459   | 108-93-0          | 8.52                        | Cyclohexanol                         |
| 104.0602   | 100-42-5          | 8.61                        | Styrene                              |
| 105.0375   | 100-52-7          | 11.09                       | Benzaldehyde                         |
| 105.0779   | 95-63-6           | 11.33                       | 1,2,4-Trimethylbenzene               |
| 57.06854   | 104-76-7          | 13.47                       | 2-Ethyl-1-Hexanol                    |
| 55.05294   | 14507-02-9        | 13.47                       | 2,4-Decadien-1-ol                    |
| 98.1042    | 124-19-6          | 15.94                       | Nonanal                              |
| 128.0648   | 91-20-3           | 18.05                       | Naphthalene                          |
| 91.05252   | 1014-60-4         | 19.25                       | Benzene, 1,3-bis(1,1-dimethylethyl)- |
| 91.05247   | 96-76-4           | 21.89                       | Phenol, 2,4-bis(1,1-dimethylethyl)-  |

**Table S2.** Comparison of match, reverse match and probability scores of the 13 VOCs confirmed with standards.

|    | <b>Compound</b>        | <b>Sample</b> |                      |                    | <b>Standards</b> |                      |                    |
|----|------------------------|---------------|----------------------|--------------------|------------------|----------------------|--------------------|
|    |                        | <b>Match</b>  | <b>Reverse Match</b> | <b>Probability</b> | <b>Match</b>     | <b>Reverse Match</b> | <b>Probability</b> |
| 1  | Acetone                | 712           | 765                  | 50                 | 703              | 802                  | 45.3               |
| 2  | Pentane,2-methyl       | 706           | 732                  | 6.5                | 704              | 737                  | 7.58               |
| 3  | Propanal               | 703           | 712                  | 12.3               | 713              | 725                  | 25.9               |
| 4  | Toluene                | 866           | 895                  | 34                 | 795              | 850                  | 24.1               |
| 5  | Hexanal                | 727           | 804                  | 14.9               | 706              | 812                  | 16.7               |
| 6  | Ethylbenzene           | 878           | 901                  | 60.4               | 903              | 925                  | 67.2               |
| 7  | o-xylene               | 868           | 914                  | 29                 | 894              | 913                  | 28.4               |
| 8  | m & p-Xylene           | 849           | 909                  | 32.4               | 890              | 910                  | 28.3               |
| 9  | Styrene                | 707           | 856                  | 19.4               | 726              | 877                  | 14.1               |
| 10 | 1,2,4-Trimethylbenzene | 721           | 877                  | 14.3               | 810              | 907                  | 22.8               |
| 11 | 2-Ethyl-1-Hexanol      | 785           | 820                  | 14.6               | 742              | 849                  | 9.9                |
| 12 | Nonanal                | 768           | 806                  | 13.5               | 726              | 815                  | 10.9               |
| 13 | Naphthalene            | 919           | 942                  | 55                 | 939              | 950                  | 45.1               |

**Table S3.** Retention time and m/z values of identified statistically differential non-volatile metabolites.

|    | RT<br>(min) | M/Z            | Compound               |
|----|-------------|----------------|------------------------|
| 1  | 4.069       | 73             | Acetamide              |
| 2  | 4.427       | 145            | Dimethylurea           |
| 3  | 4.8         | 144            | Valine                 |
| 4  | 5.008       | 174            | Phenylethanolamine     |
| 5  | 5.441       | 158            | Leucine                |
| 6  | 5.7         | 73,158         | Isoleucine             |
| 7  | 5.789       | 73,142         | Proline                |
| 8  | 5.9         | 73,147,174     | Glycine                |
| 9  | 5.98        | 75,117,132,199 | Cyclohexaneacetic acid |
| 10 | 6.263       | 73,99,147,241  | Pyrimidine             |
| 11 | 6.439       | 73,147,245     | 3-Ketovaleric acid     |
| 12 | 6.531       | 73,204,218     | Serine                 |
| 13 | 6.891       | 73,117,218,219 | Threonine              |
| 14 | 7.55        | 73,147,174,248 | Alanine                |
| 15 | 8.16        | 73,147,218     | Aminomalonic acid      |
| 16 | 8.451       | 73,147         | Butanedioic acid       |
| 17 | 8.98        | 73,100,232     | Aspartic acid          |
| 18 | 10.58       | 73,142         | Ornithine              |
| 19 | 10.64       | 73,128,246     | Glutamic acid          |
| 20 | 10.756      | 73,192,218     | Phenylalanine          |
| 21 | 11.5        | 73,116,231     | Asparagine             |
| 22 | 12.42       | 73,147,217     | Ribitol                |
| 23 | 13.72       | 73,265,280     | Purine                 |
| 24 | 14.54       | 117,285        | Tetradecanoic acid     |
| 25 | 14.8        | 73,217,307     | Fructose               |
| 26 | 15.1        | 319            | mannose                |
| 27 | 15.58       | 73,147,205,319 | Glucose                |
| 28 | 15.7        | 73,174,317     | Lysine                 |
| 29 | 15.9        | 73,218         | Tyrosine               |
| 30 | 17.7        | 117,313        | Hexadecanoic acid      |
| 31 | 18.31       | 73,147,217,305 | Inositol               |
| 32 | 18.95       | 73,147,319     | Allose                 |
| 33 | 20.238      | 117,339        | Oleic acid             |
| 34 | 20.64       | 117,341        | Octadecanoic acid      |
| 35 | 23.37       | 73,217         | Uridine                |
| 36 | 26.47       | 73,204,361     | Lactose                |
| 37 | 31.028      | 129,329,368    | Cholesterol            |

**Table S4.** Comparison of match, reverse match and probability scores of the 20 non-volatile metabolites confirmed with standards.

|    | <b>Compounds</b>  | <b>Chemical Standards</b> |                      |                        | <b>Sample</b> |                      |                        |
|----|-------------------|---------------------------|----------------------|------------------------|---------------|----------------------|------------------------|
|    |                   | <b>Match</b>              | <b>Reverse Match</b> | <b>Probability (%)</b> | <b>Match</b>  | <b>Reverse Match</b> | <b>Probability (%)</b> |
| 1  | Valine            | 879                       | 879                  | 74                     | 877           | 880                  | 76.1                   |
| 2  | Leucine           | 887                       | 887                  | 41.1                   | 852           | 862                  | 38.9                   |
| 3  | Isoleucine        | 899                       | 911                  | 63                     | 908           | 927                  | 62.9                   |
| 4  | Proline           | 882                       | 885                  | 94.1                   | 876           | 886                  | 95.6                   |
| 5  | Glycine           | 904                       | 904                  | 87.4                   | 889           | 899                  | 86.7                   |
| 6  | Serine            | 902                       | 904                  | 84.2                   | 892           | 895                  | 81.3                   |
| 7  | Threonine         | 911                       | 912                  | 94.2                   | 893           | 913                  | 95.7                   |
| 8  | Phenylalanine     | 902                       | 902                  | 55.9                   | 890           | 891                  | 59.4                   |
| 9  | Asparagine        | 890                       | 911                  | 81.9                   | 823           | 867                  | 78.5                   |
| 10 | Ornithine         | 851                       | 852                  | 93.2                   | 837           | 851                  | 92.7                   |
| 11 | Lysine            | 755                       | 795                  | 92.8                   | 764           | 809                  | 92.8                   |
| 12 | Tyrosine          | 925                       | 941                  | 86.2                   | 907           | 933                  | 77.2                   |
| 13 | Hexadecanoic acid | 837                       | 844                  | 84.3                   | 848           | 850                  | 94                     |
| 14 | Glutamic acid     | 901                       | 903                  | 92.5                   | 898           | 898                  | 90.8                   |
| 15 | Oleic acid        | 874                       | 875                  | 15.7                   | 862           | 869                  | 19.1                   |
| 16 | Octadecanoic acid | 853                       | 855                  | 85.2                   | 846           | 848                  | 93.9                   |
| 17 | Inositol          | 906                       | 906                  | 72.6                   | 909           | 909                  | 77.3                   |
| 18 | Mannose           | 879                       | 879                  | 11.2                   | 861           | 862                  | 9.6                    |
| 19 | Glucose           | 899                       | 899                  | 21                     | 855           | 897                  | 13.2                   |
| 20 | Fructose          | 868                       | 868                  | 20                     | 845           | 842                  | 12.7                   |

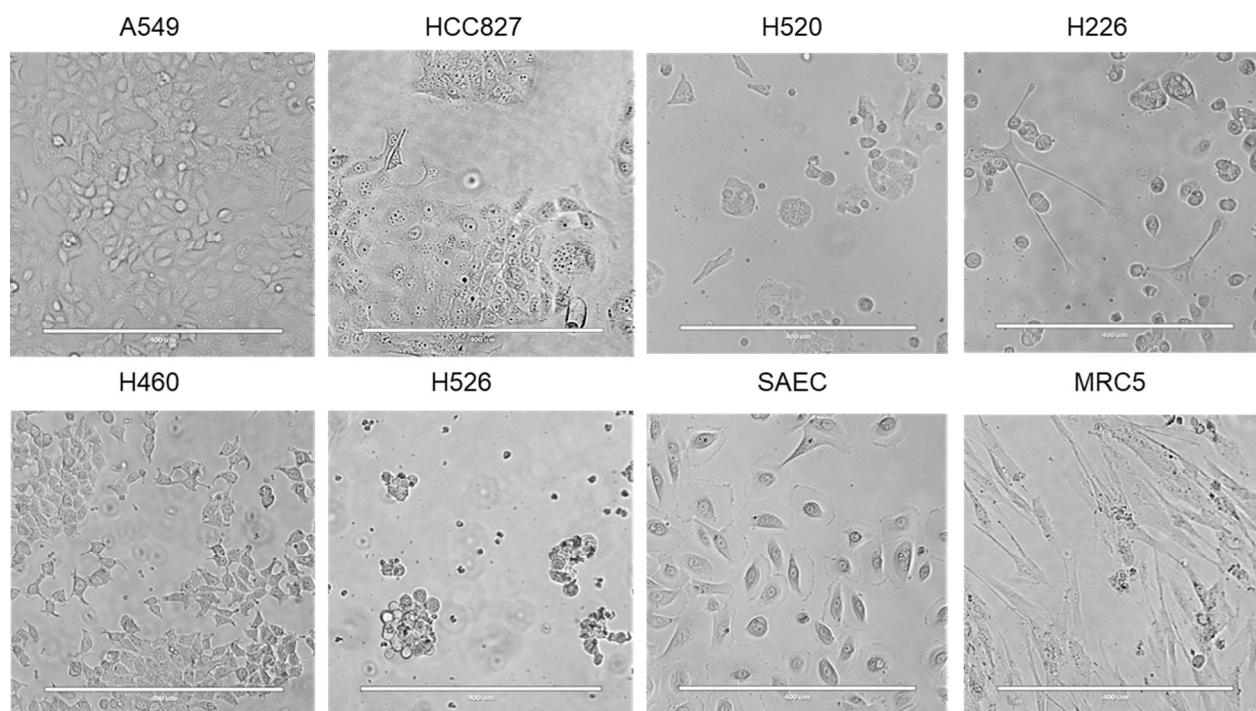

**Figure S1.** Morphology of eight lung cell lines when cultured in supplier recommended medium

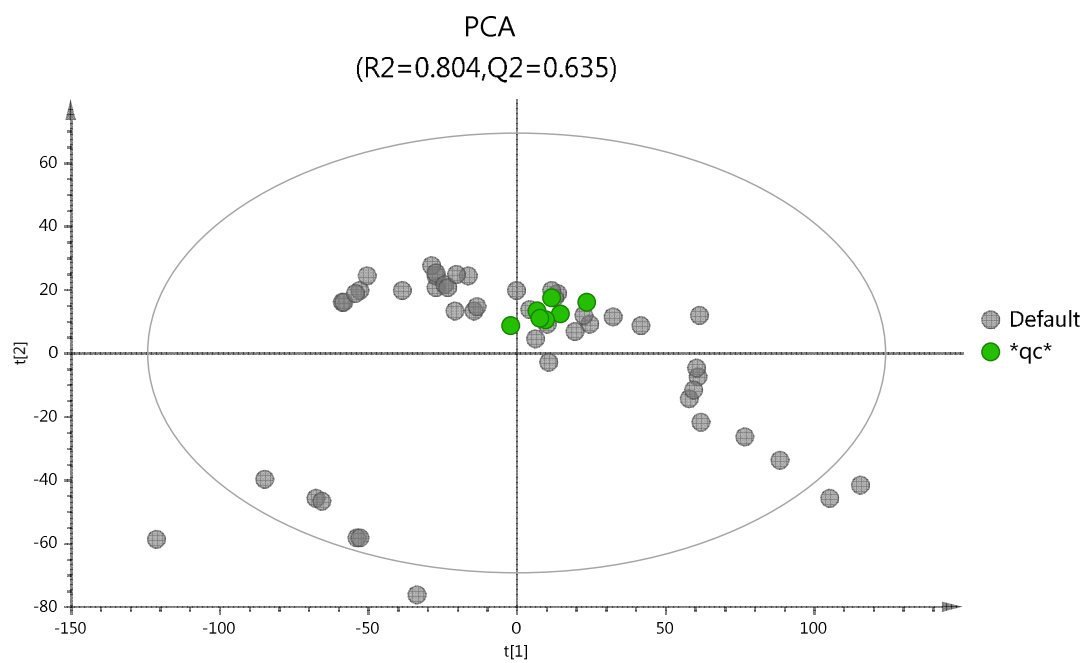

**Figure S2.** PCA score plot of metabolites profiling shows QC samples are clustered together.

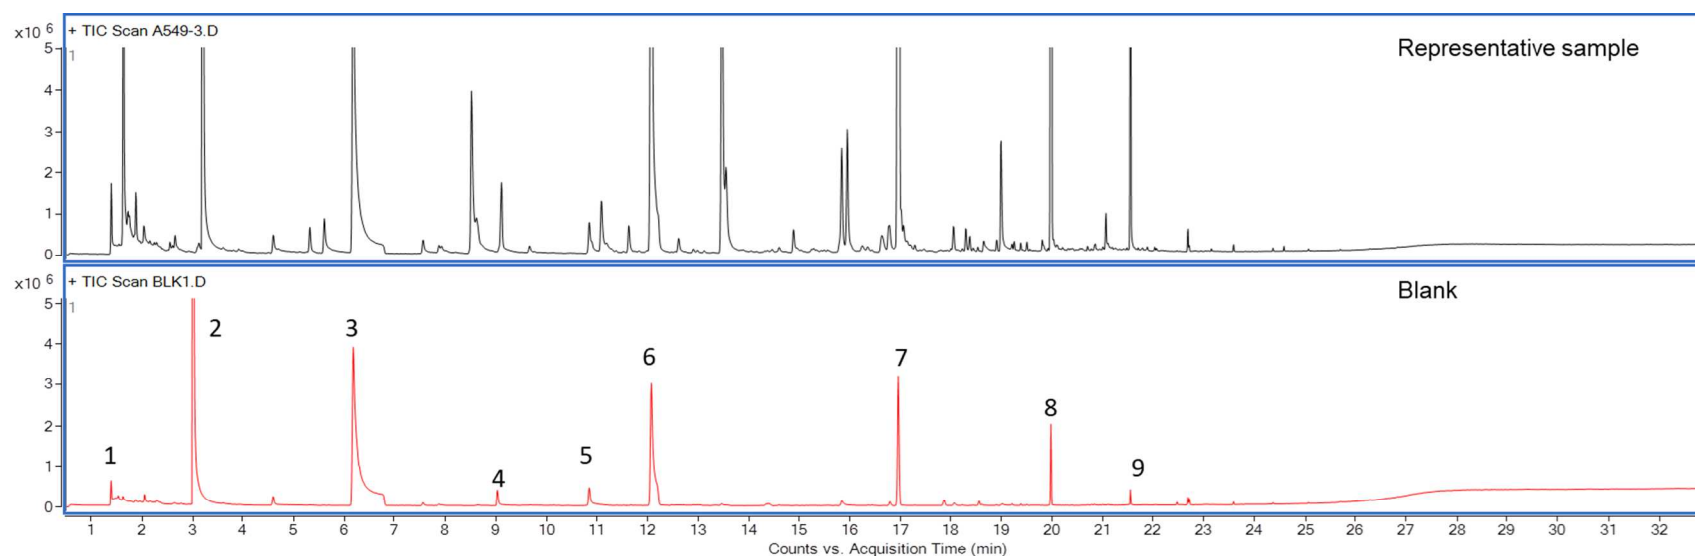

|   | RT (min) | Mass     | Compound                                | CAS           | Match | Reverse Match | Probability |
|---|----------|----------|-----------------------------------------|---------------|-------|---------------|-------------|
| 1 | 1.384    | 43.98    | carbon dioxide                          | 124-38-9      | 829   | 850           | 28.4        |
| 2 | 3.309    | 77       | Silanediol, dimethyl-                   | 1066-42-8     | 876   | 876           | 93.6        |
| 3 | 6.215    | 207.03   | Cyclotrisiloxane, hexamethyl-           | 541-05-9      | 897   | 898           | 83.8        |
| 4 | 9.04     | 133      | Oxime-, methoxy-phenyl-                 | NIST#: 222866 | 760   | 780           | 71.7        |
| 5 | 10.83    | 192.97   | Vanillin, tert-butyldimethylsilyl ether | NIST#: 352846 | 681   | 684           | 25.6        |
| 6 | 12.1     | 281.05   | Cyclotetrasiloxane, octamethyl-         | 556-67-2      | 907   | 912           | 90.3        |
| 7 | 16.96    | 267.001  | Cyclopentasiloxane, decamethyl-         | 541-02-6      | 914   | 916           | 39.8        |
| 8 | 19.967   | 341.0185 | Cyclohexasiloxane, dodecamethyl-        | 540-97-6      | 939   | 963           | 45.3        |
| 9 | 21.54    | 281.0504 | Cycloheptasiloxane, tetradecamethyl-    | 107-50-6      | 802   | 811           | 89.9        |

**Figure S3.** Features detected in blank SPME fiber. (TIC chromatogram with labelled compound ID, followed with a table showing the retention time, mass, compound, CAS number, match score, reverse match score and probability of each peak.)

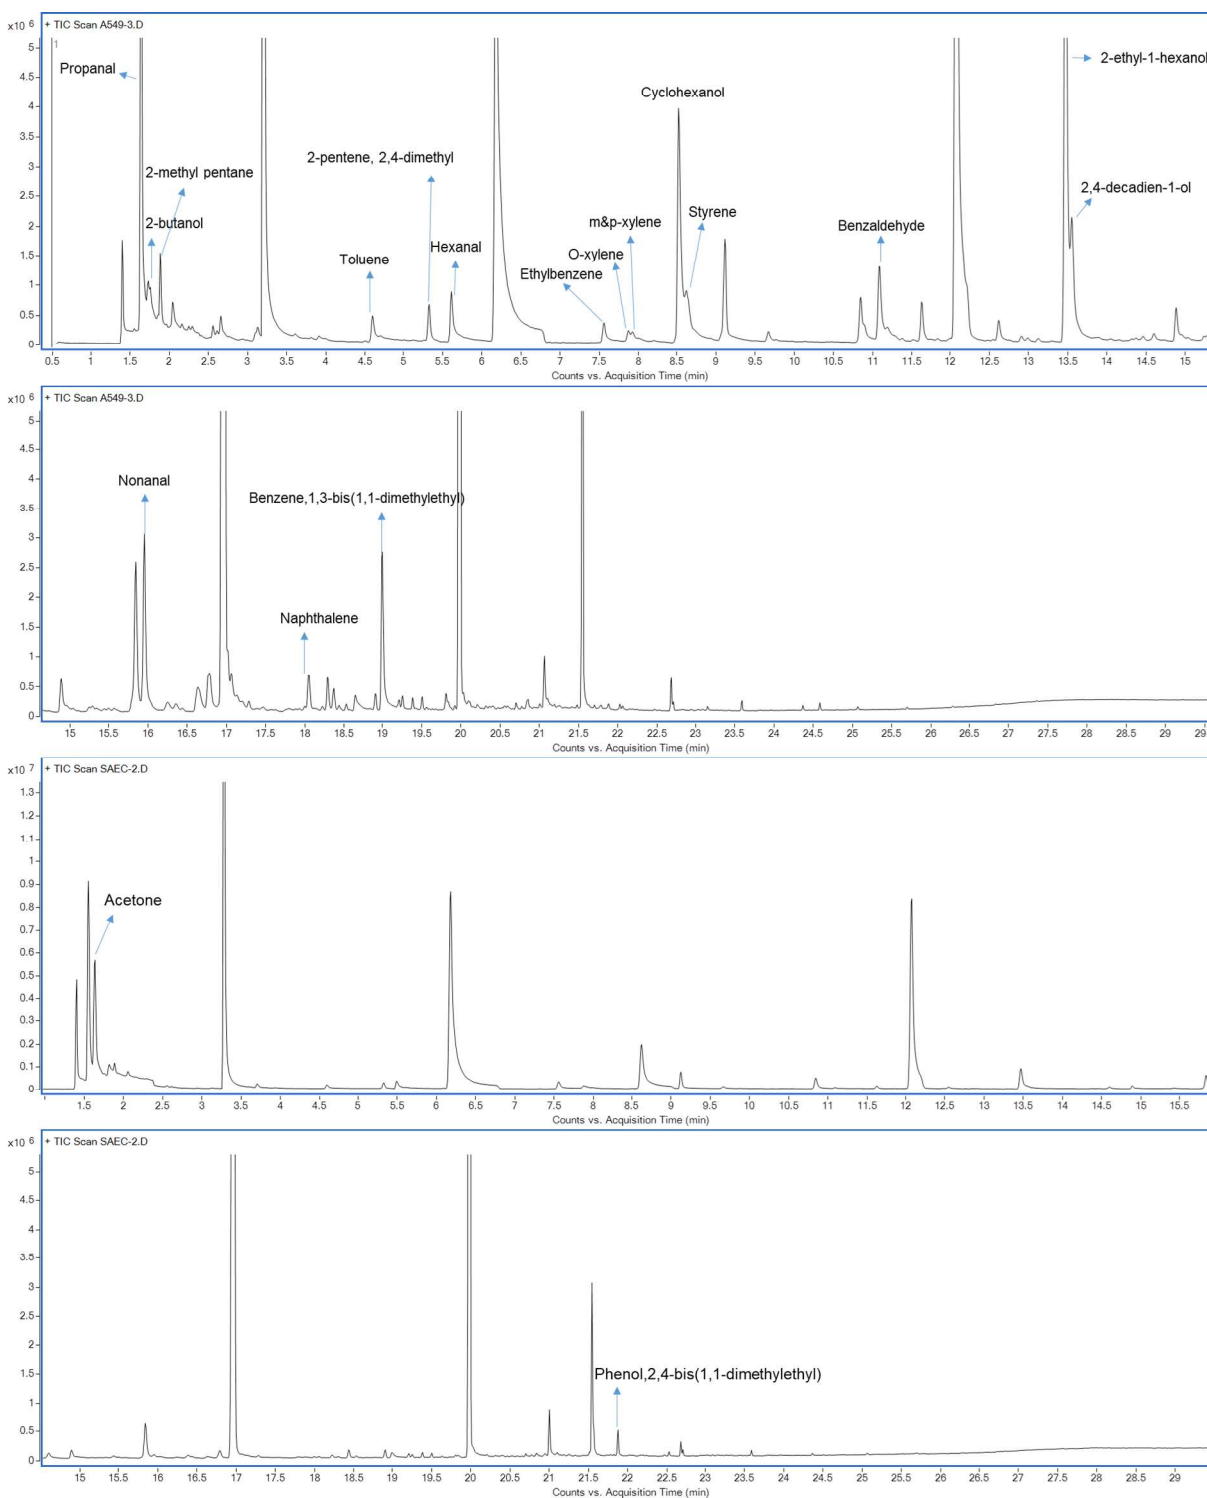

**Figure S4.** TIC of 20 VOCs in two representative samples. (acetone and phenol,2,4-bis(1,1-eimethylethyl) were shown in sample SAEC-2, the rest were shown in sample A549-3)



a)

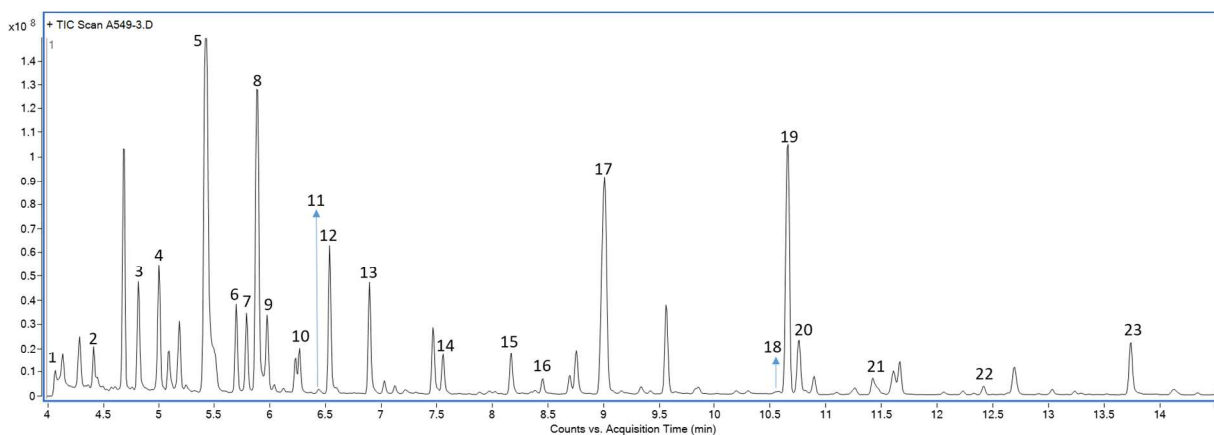

b)

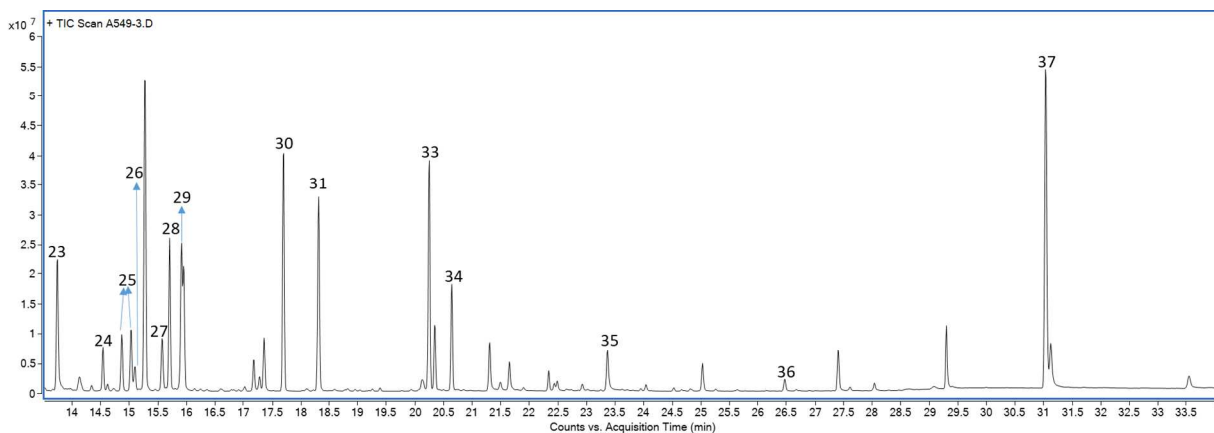

c)

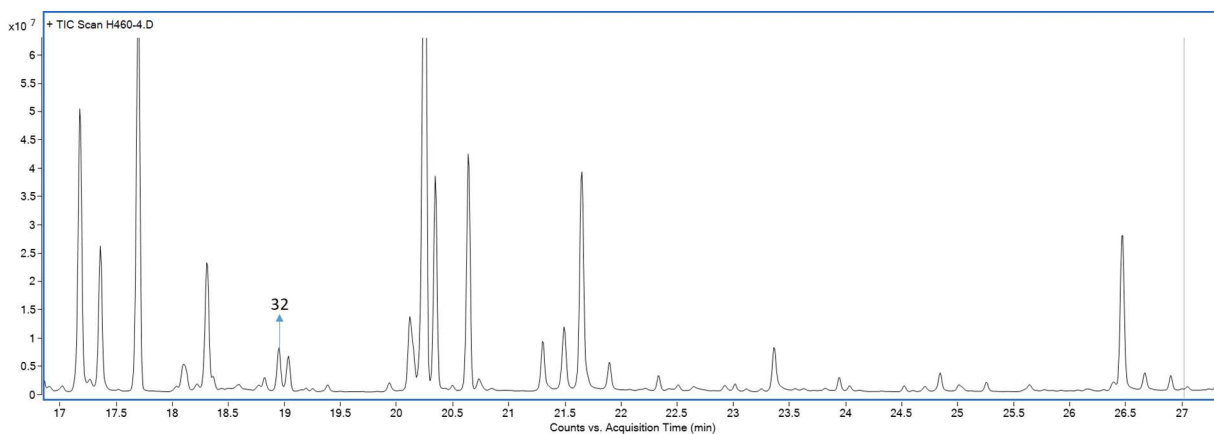

**Figure S5.** Total Ion Chromatogram of 37 non-volatile metabolites in a representative sample. a) 4-14 mins. (1: Acetamide; 2: Dimethylurea; 3: Valine; 4: Phenylethanolamine; 5: Leucine; 6: Isoleucine; 7: Proline; 8: Glycine; 9: Cyclohexaneacetic acid; 10: Pyrimidine; 11: 3-Ketovaleric acid; 12: Serine; 13: Threonine; 14: Alanine; 15: Aminomalonic acid; 16: Butanedioic acid; 17: Aspartic acid; 18: Ornithine; 19: Glutamic acid; 20: Phenylalanine; 21: Asparagine; 22: Ribitol; 23: Purine;) b) 14-34 mins. (24: Tetradecanoic acid; 25: Fructose; 26: Mannose; 27: Glucose; 28: Lysine; 29: Tyrosine; 30: Hexadecanoic acid; 31: Inositol; 33: Oleic acid; 34: Octadecanoic acid; 35: Uridine; 36: Lactose; 37: Cholesterol) c).

Compound 32 Allose is of very low level in the selected sample (A549-3), therefore its TIC peak was shown in another sample (H460-4)

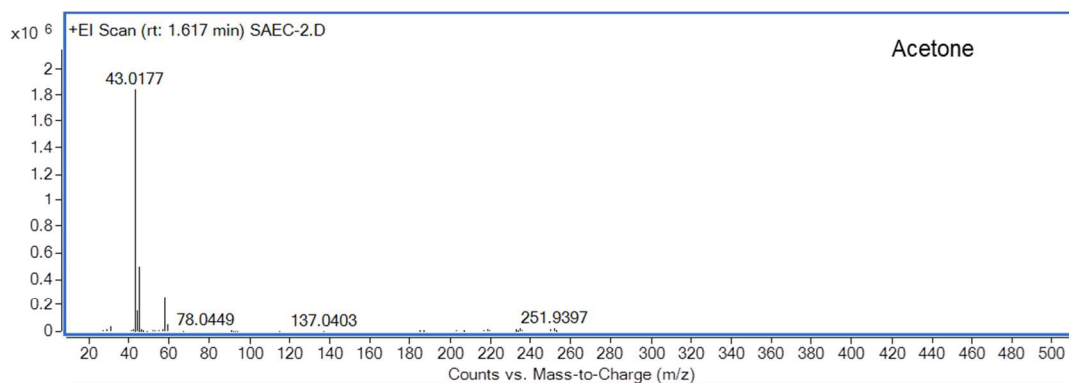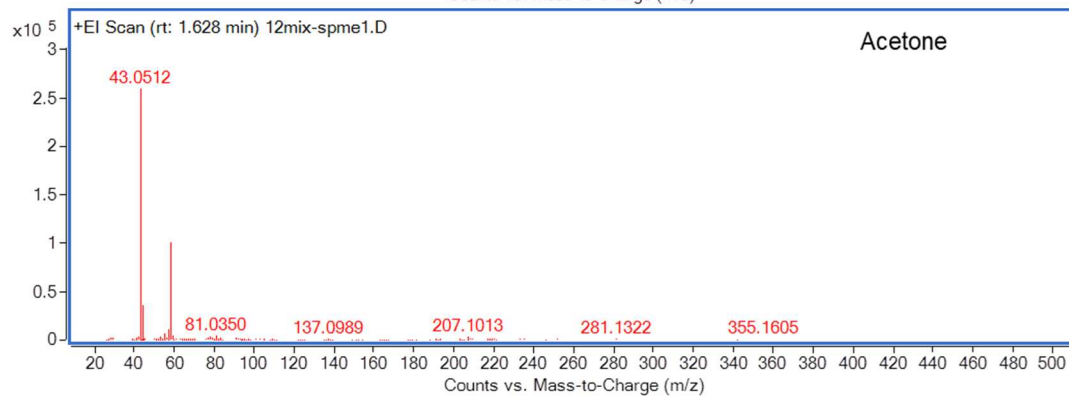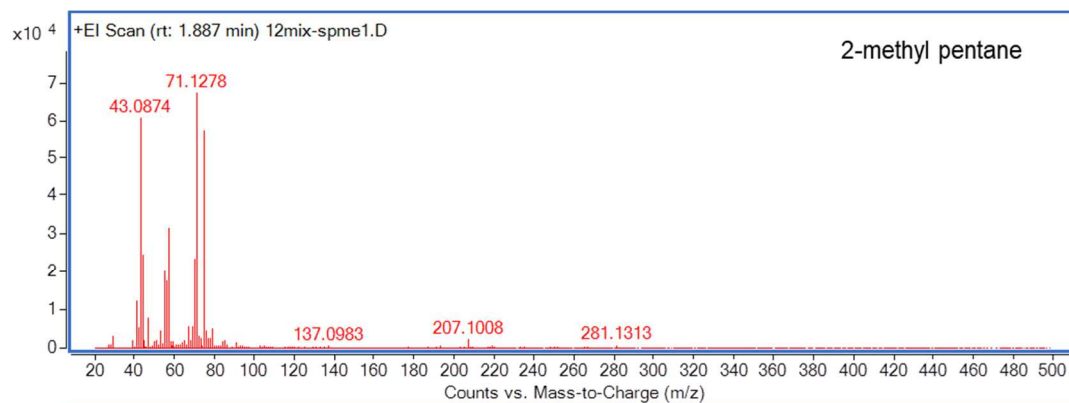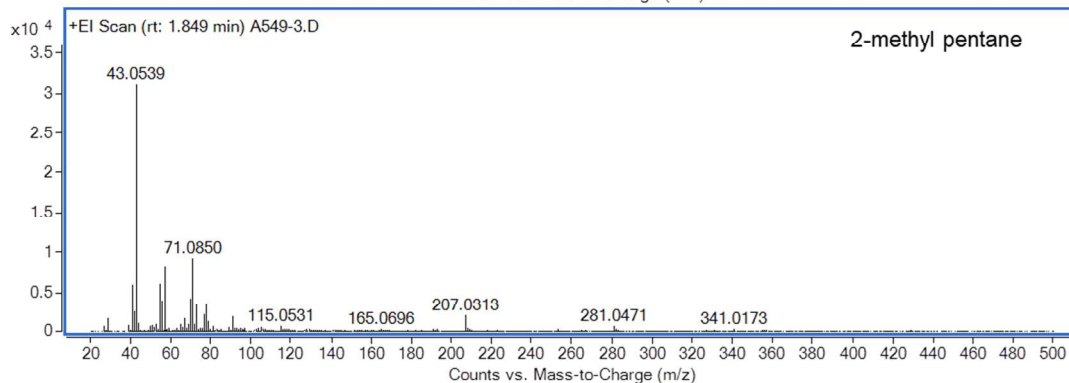

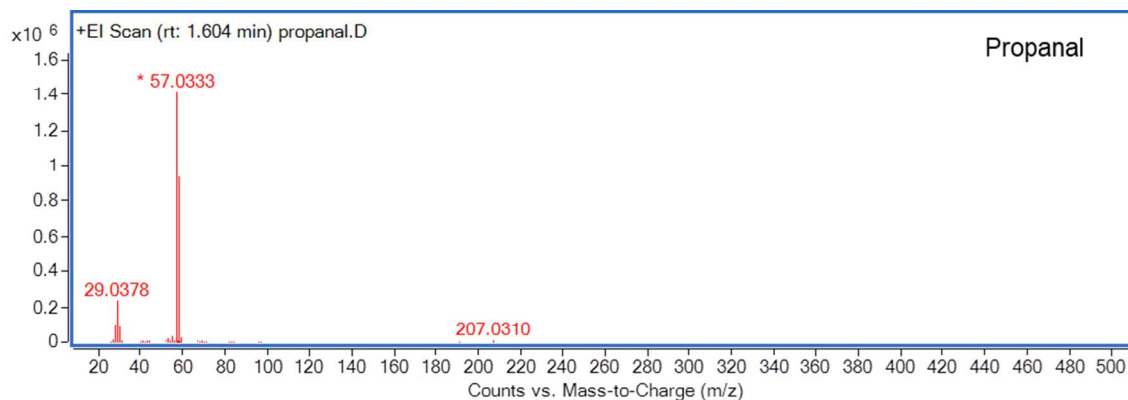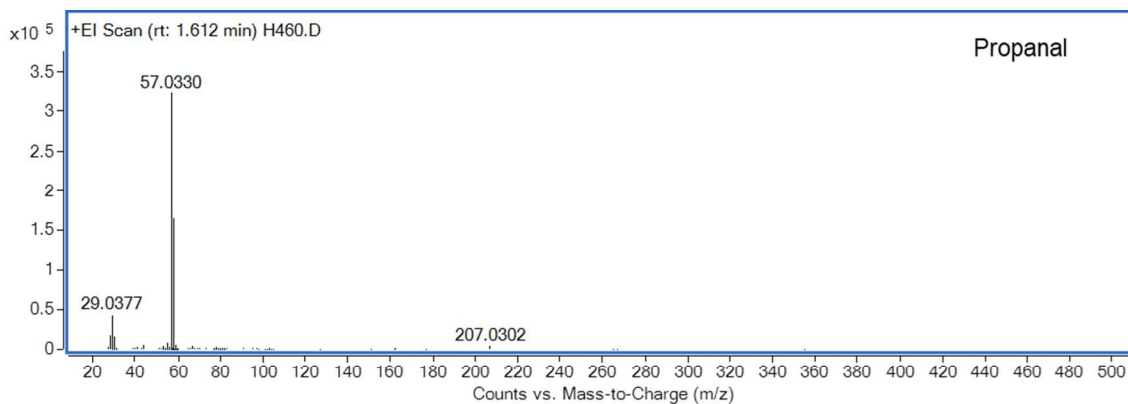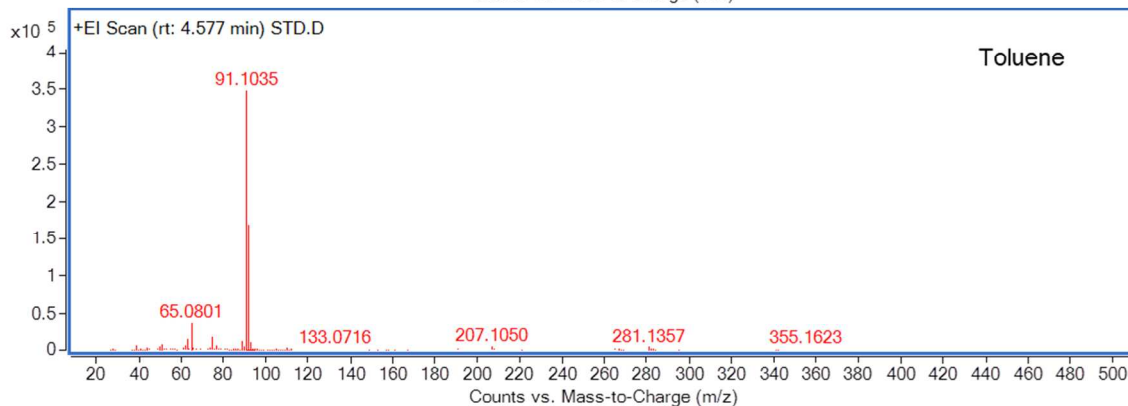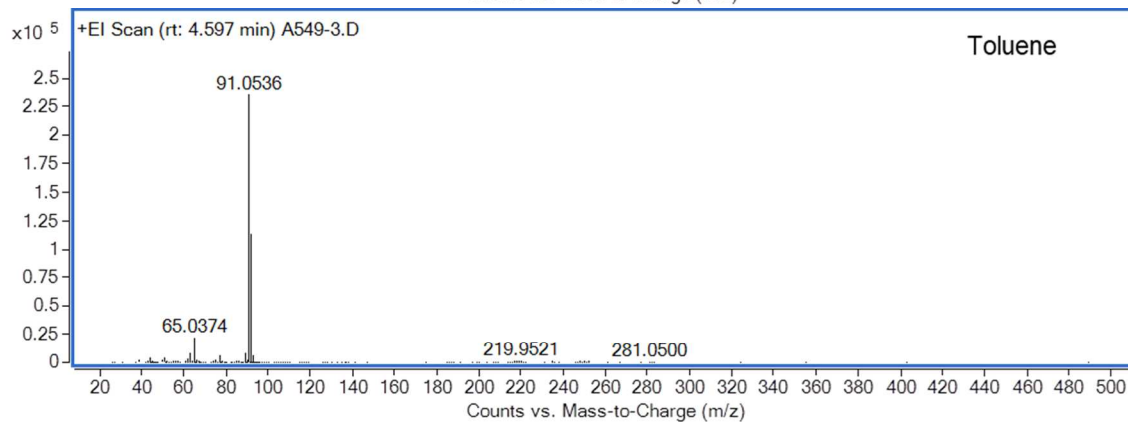

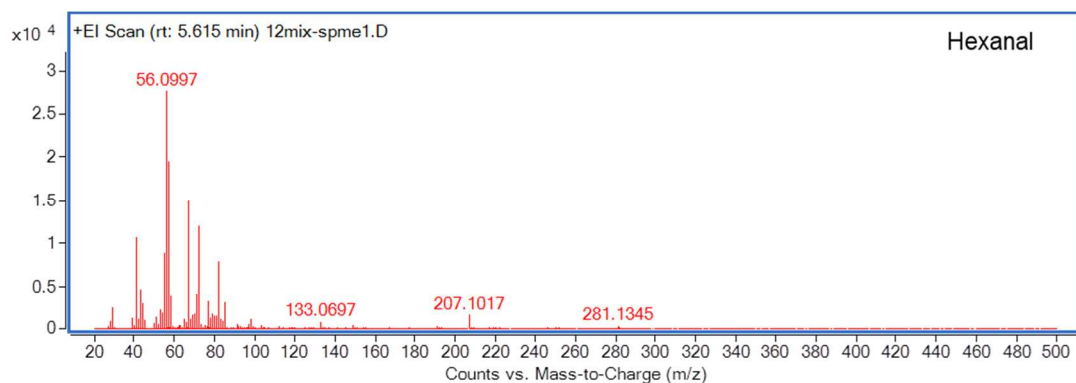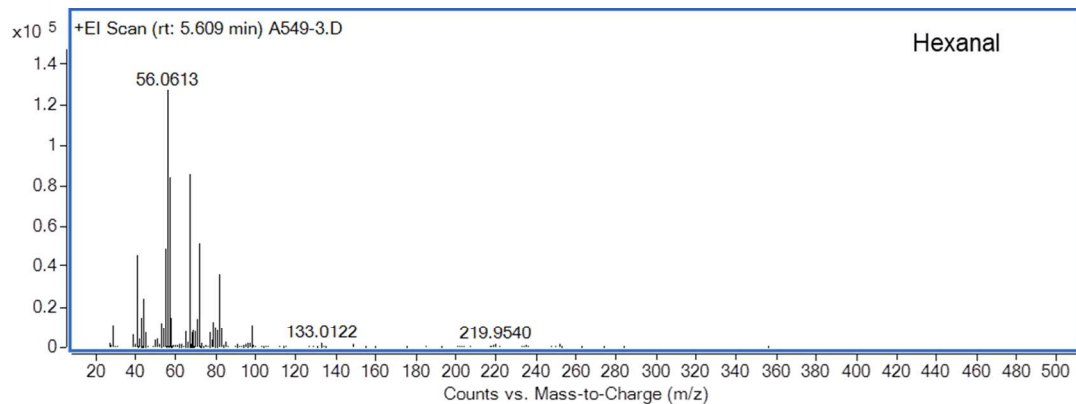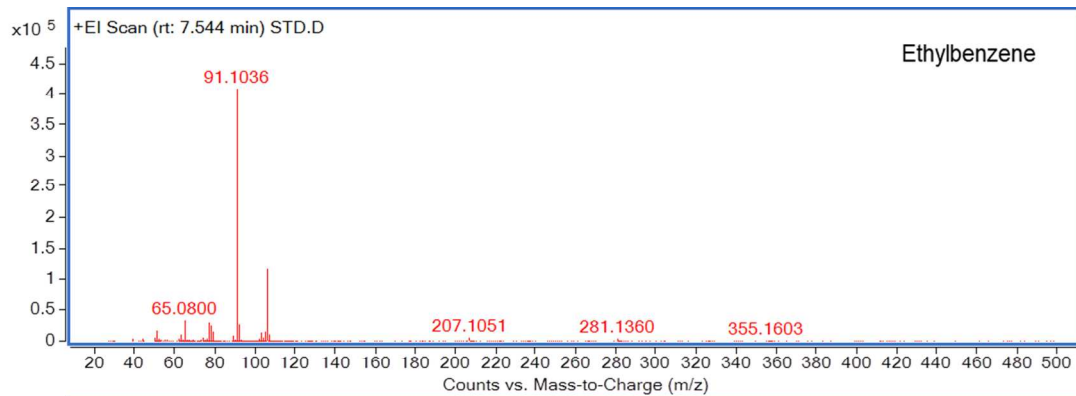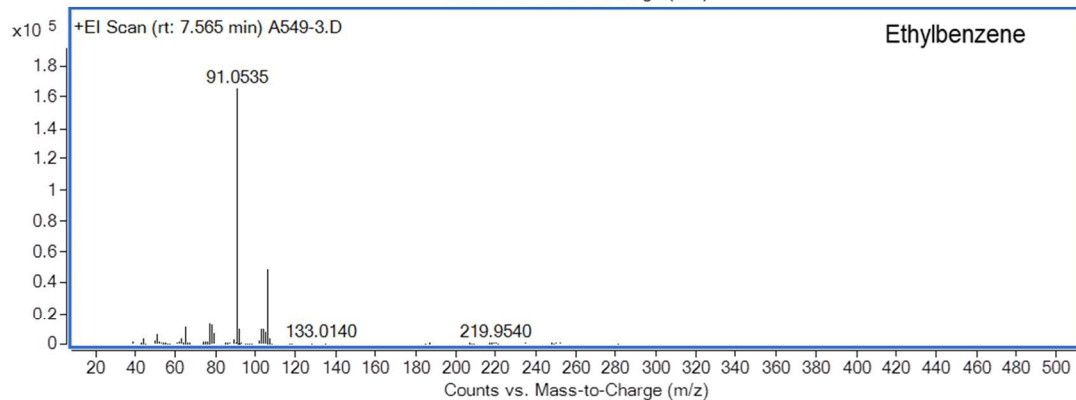

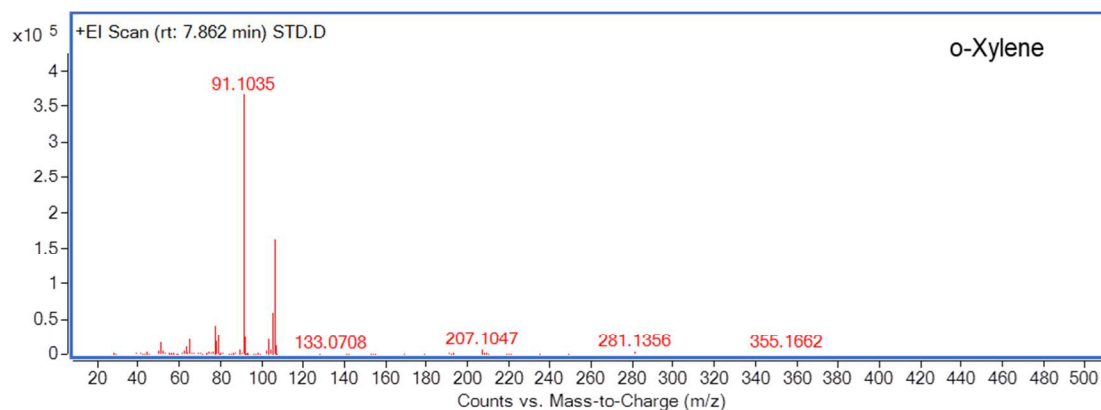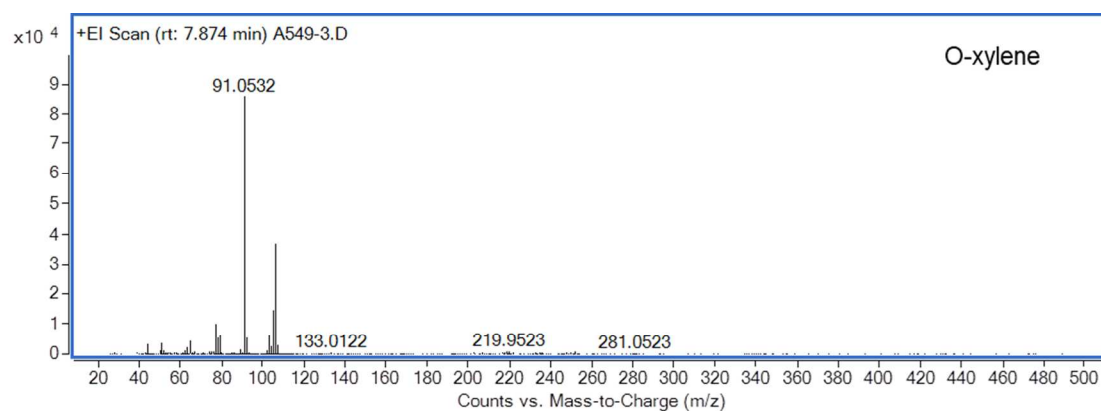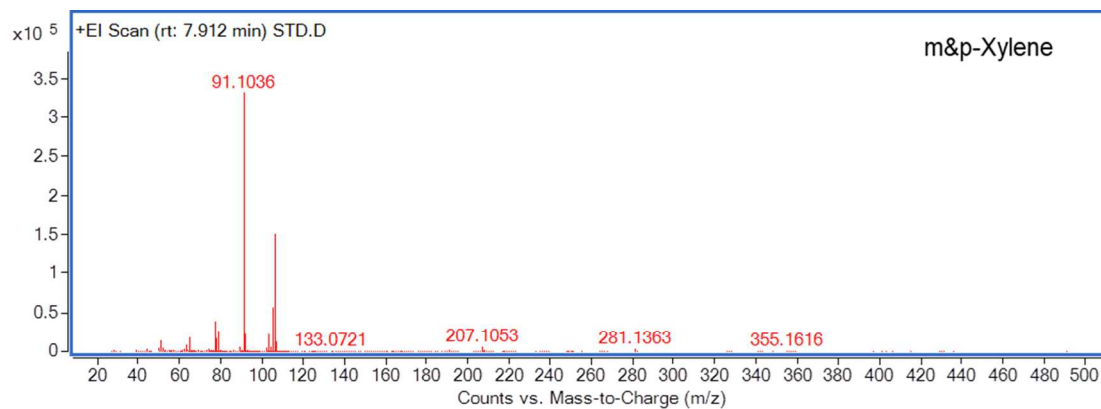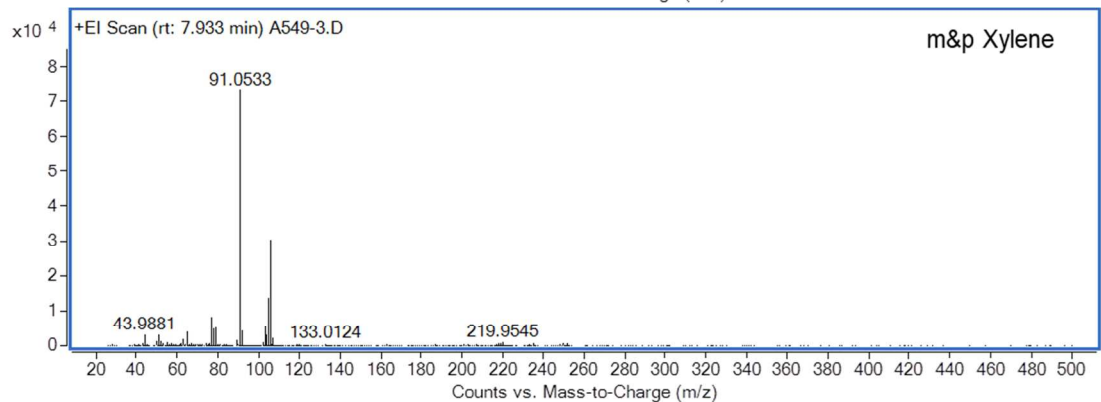

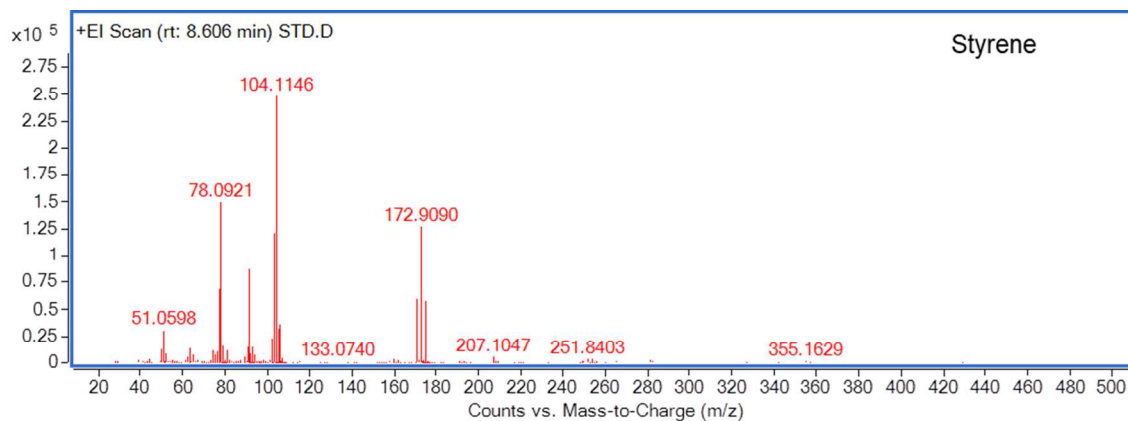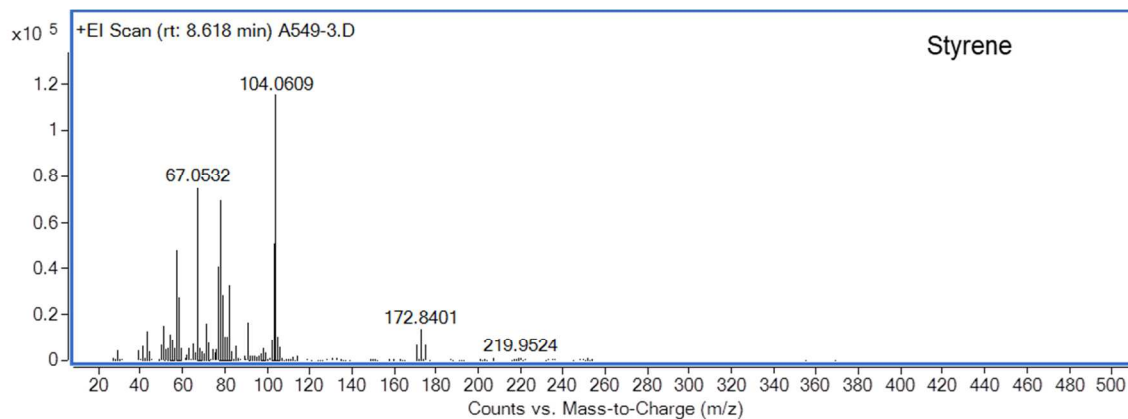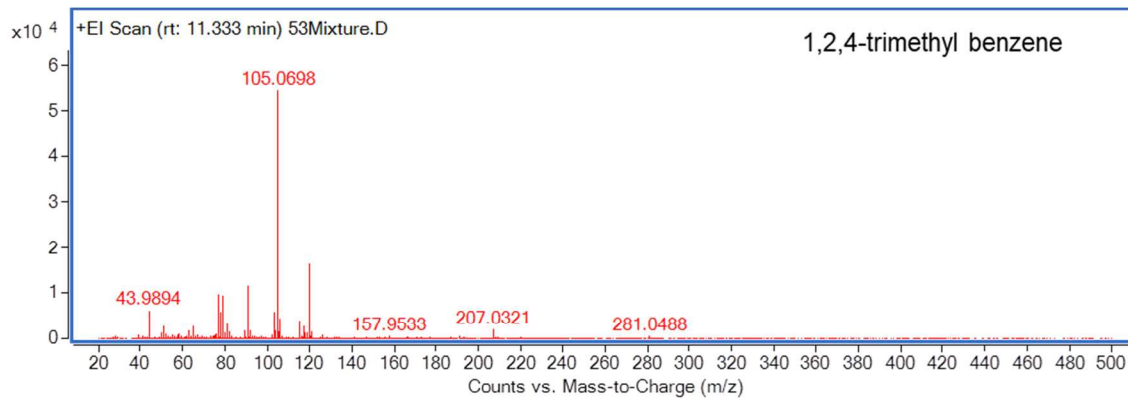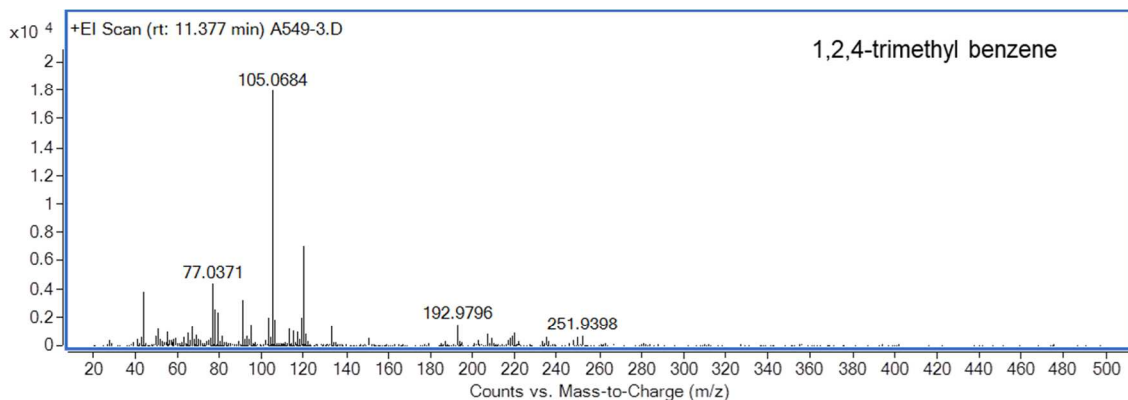

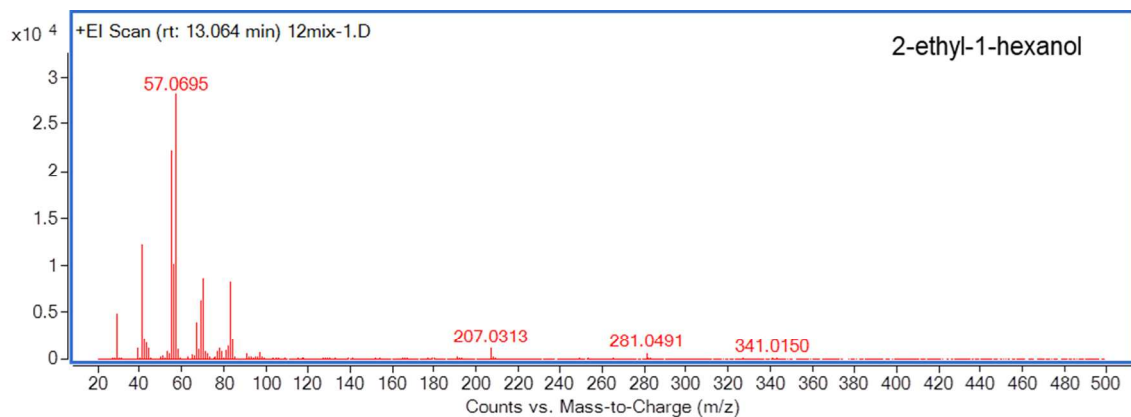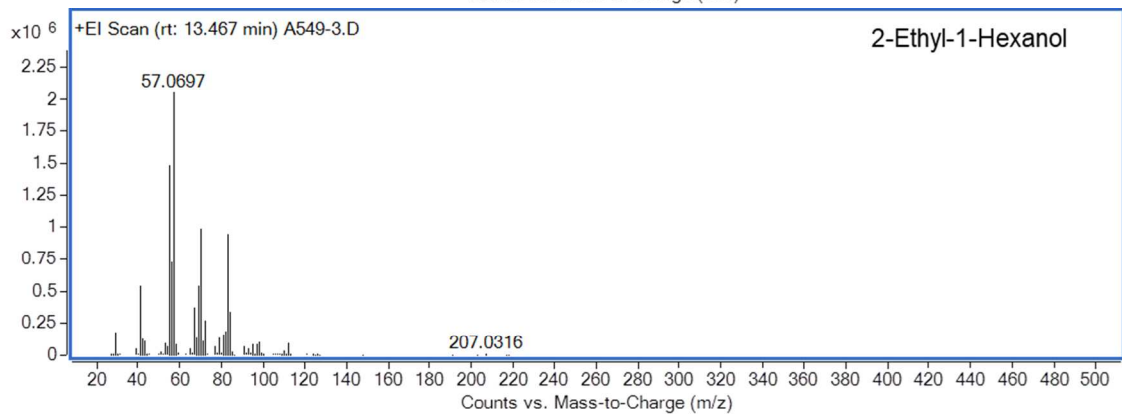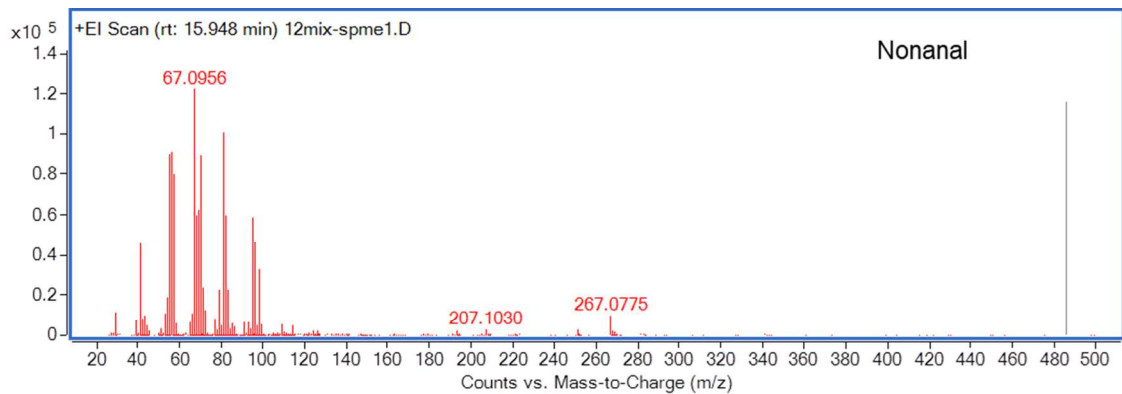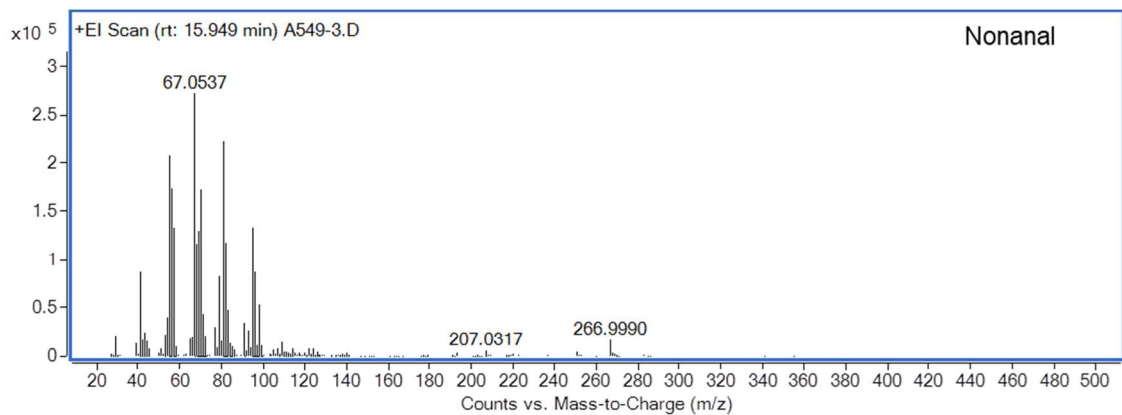



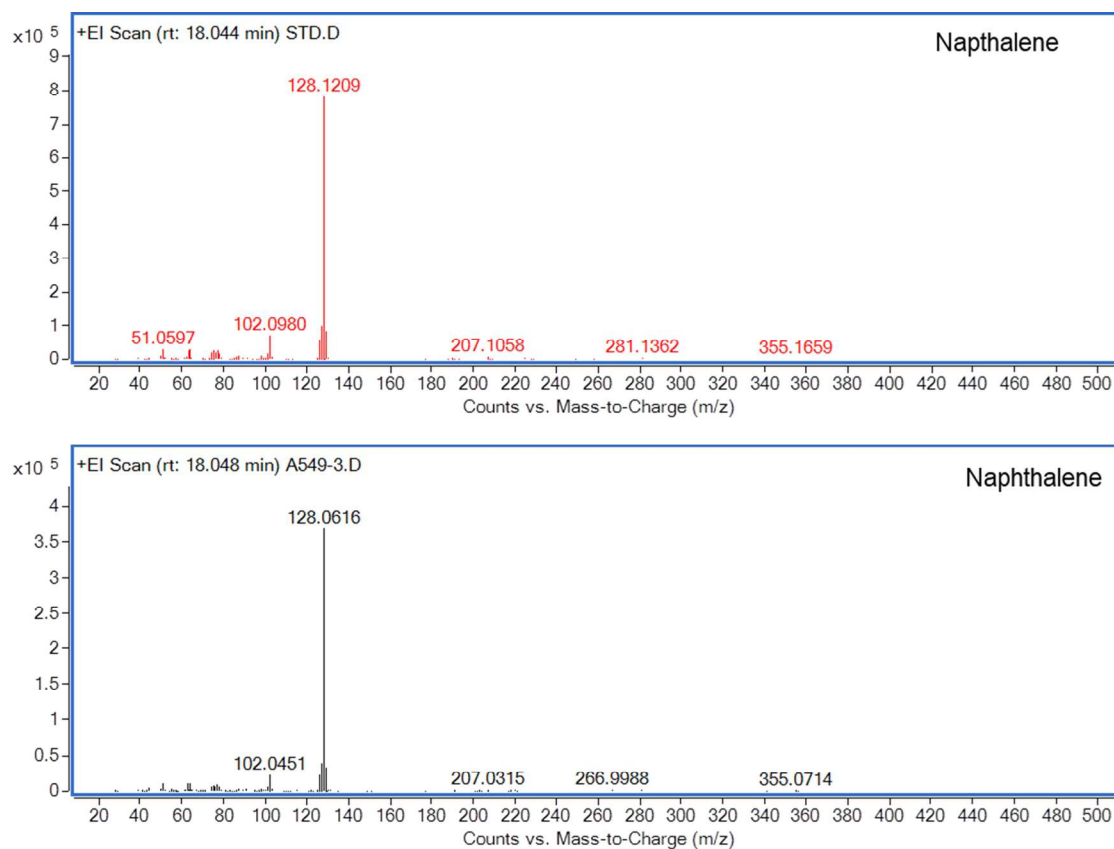

**Figure S6.** Parallel comparisons of spectrums of 13 VOCs in sample and in standards. Spectrum of standard is in red, spectrum of sample is in black.

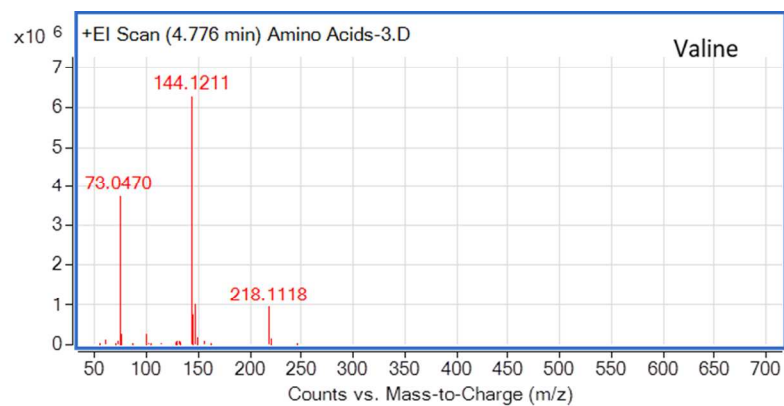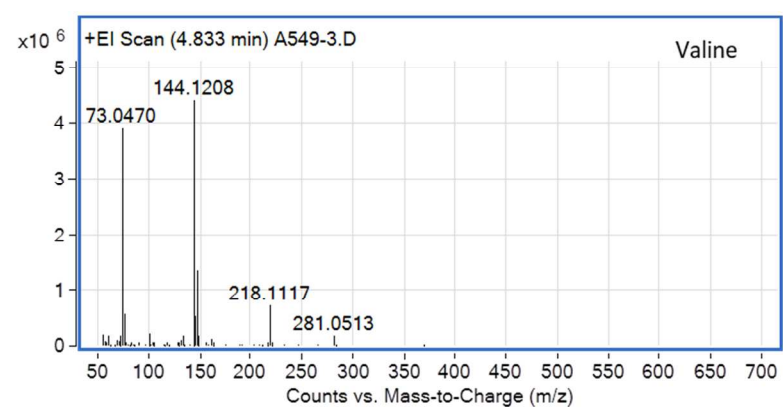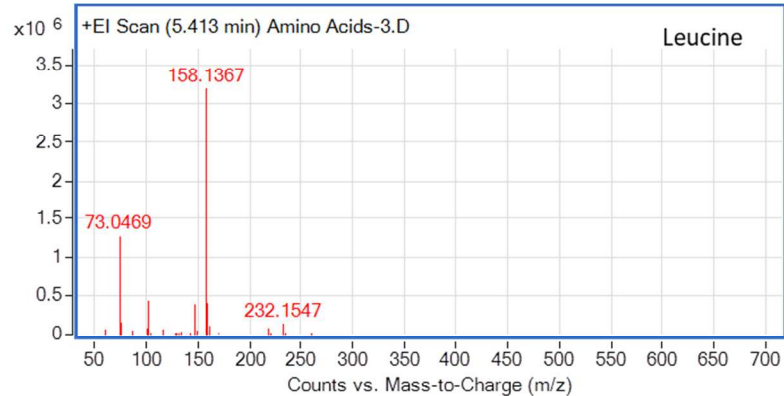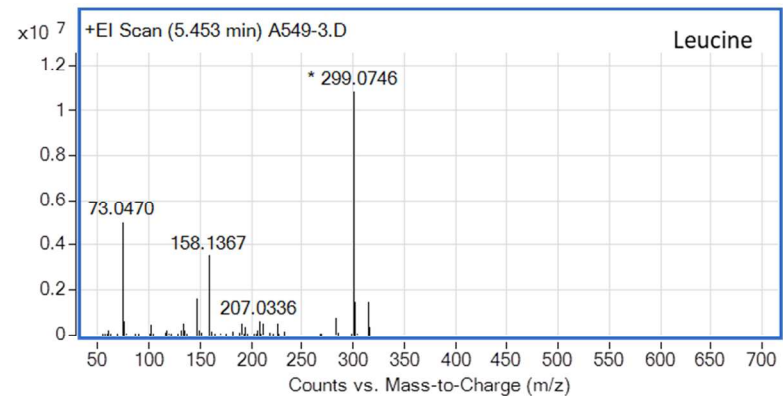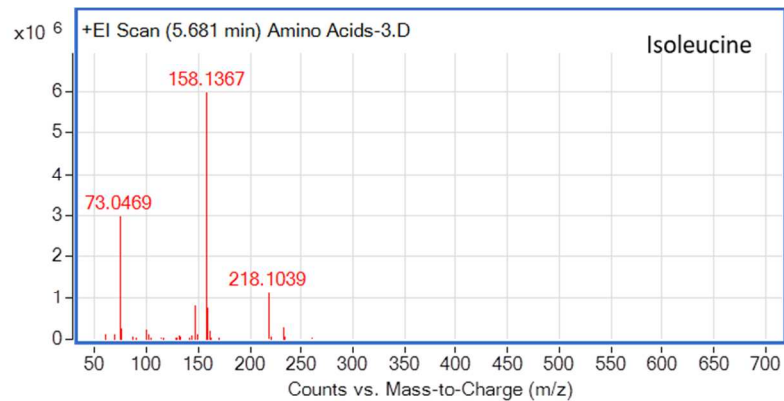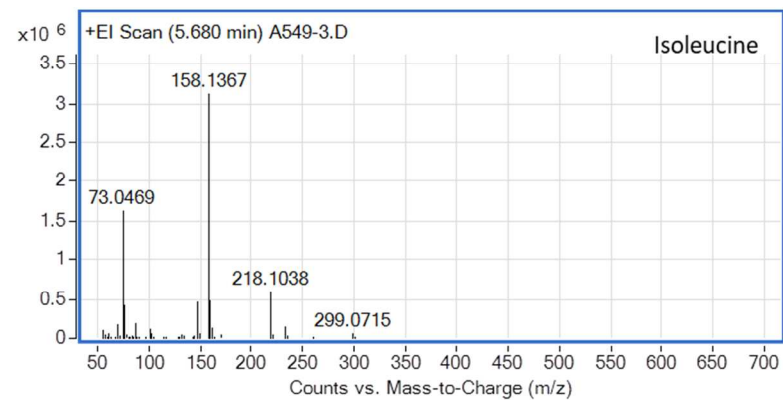

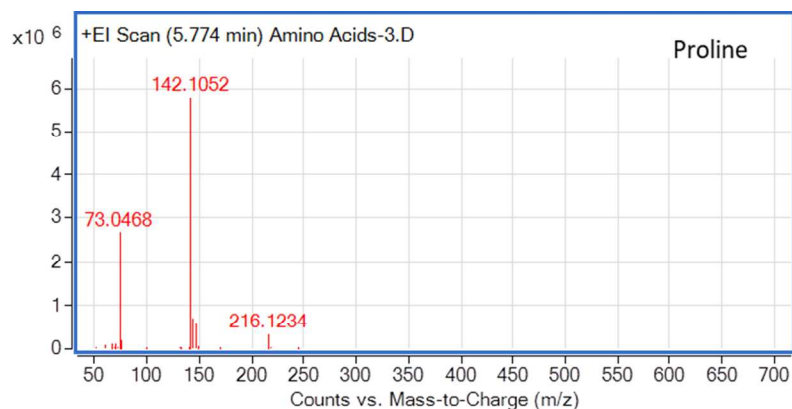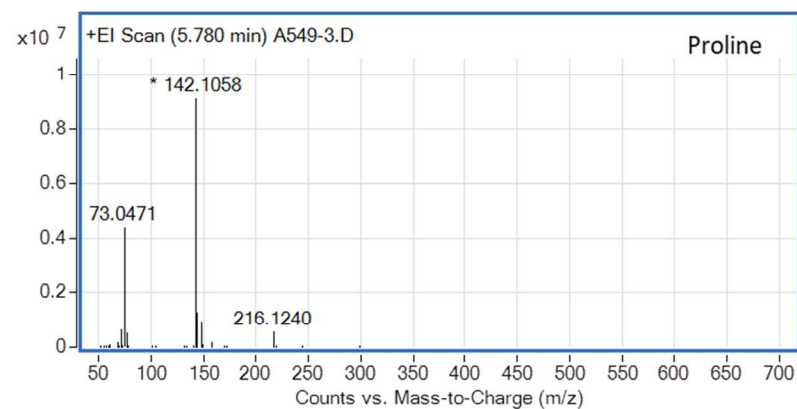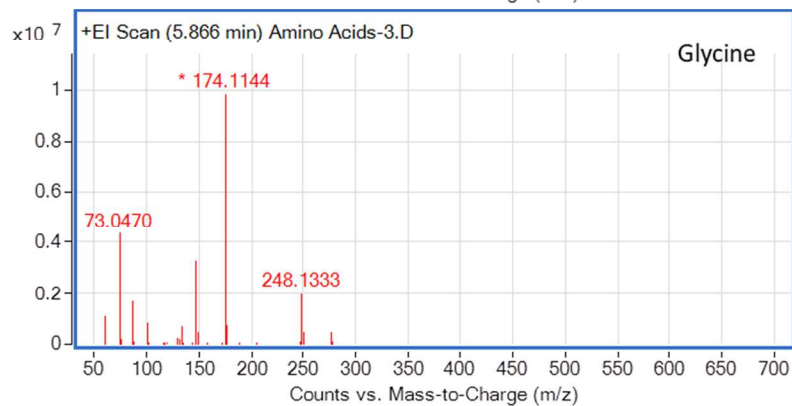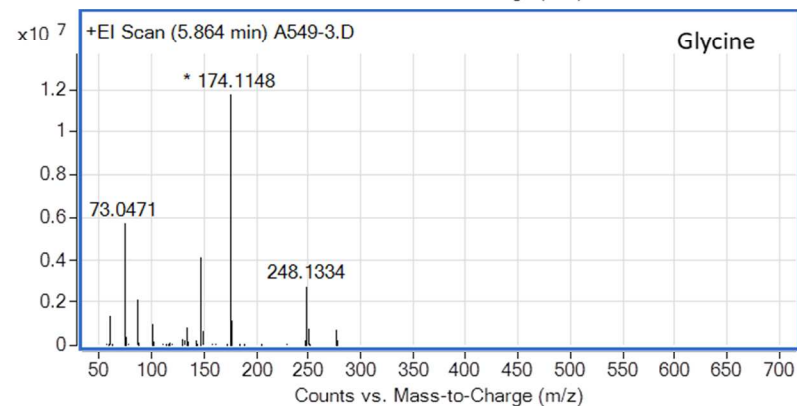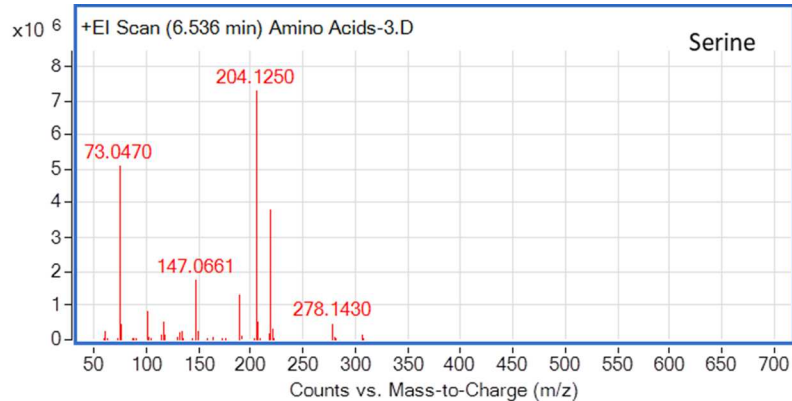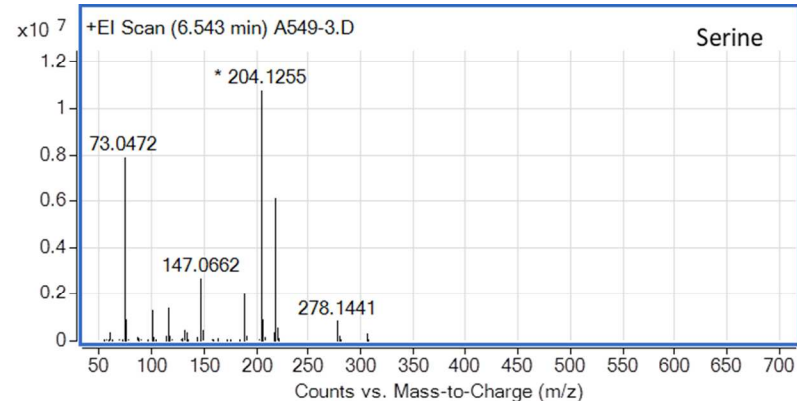

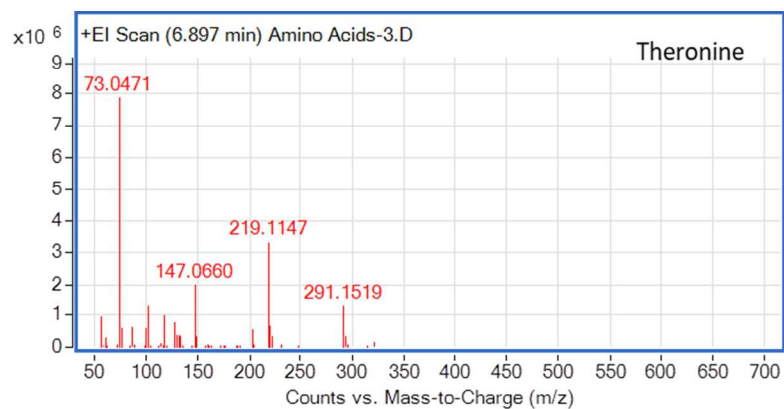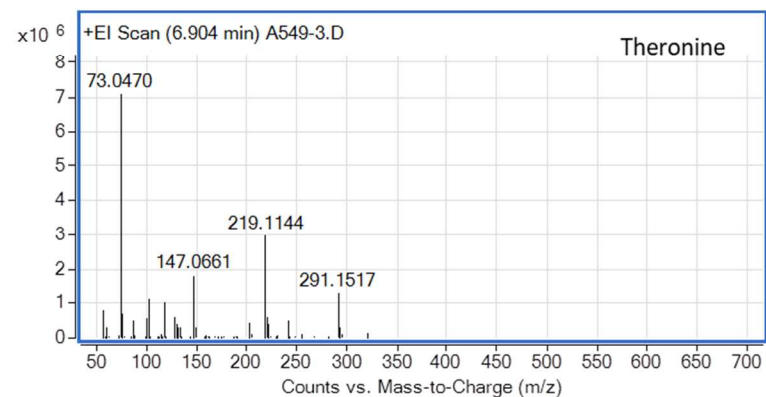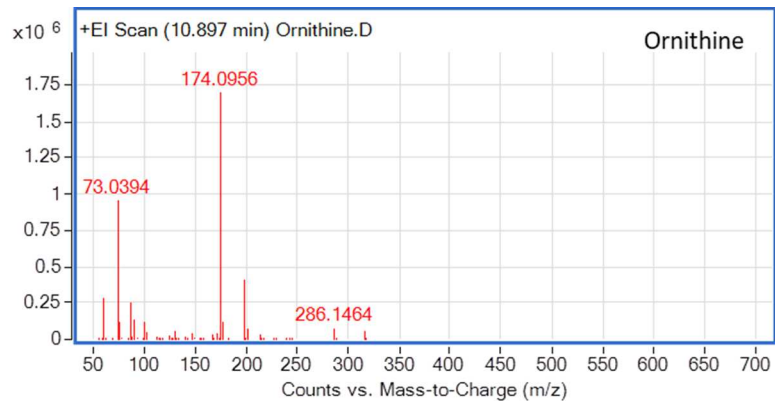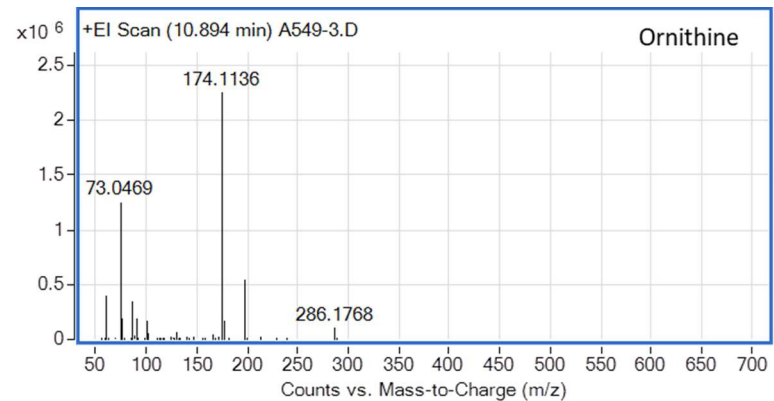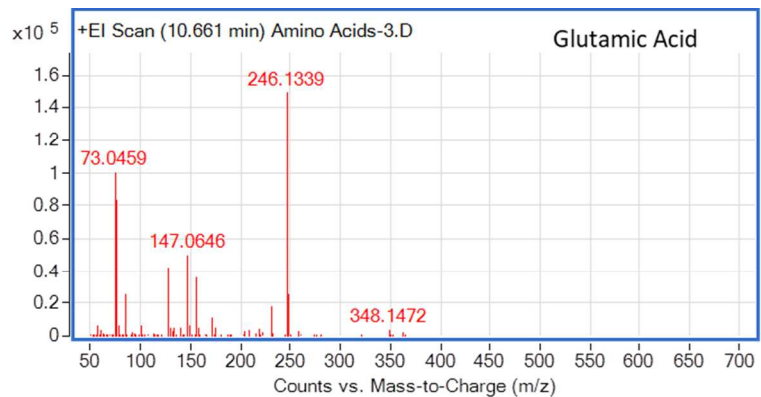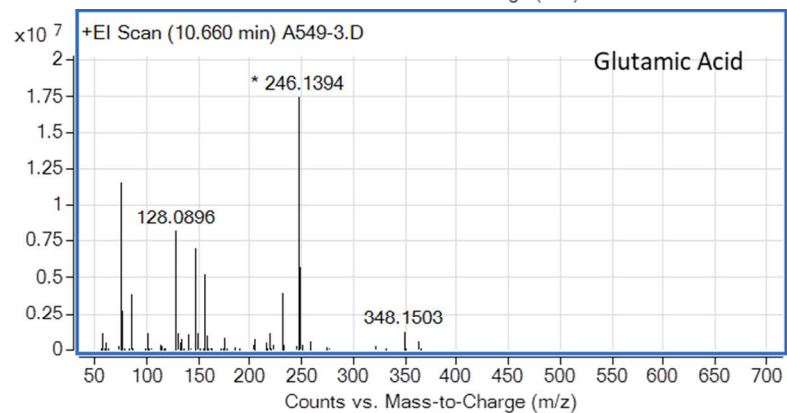

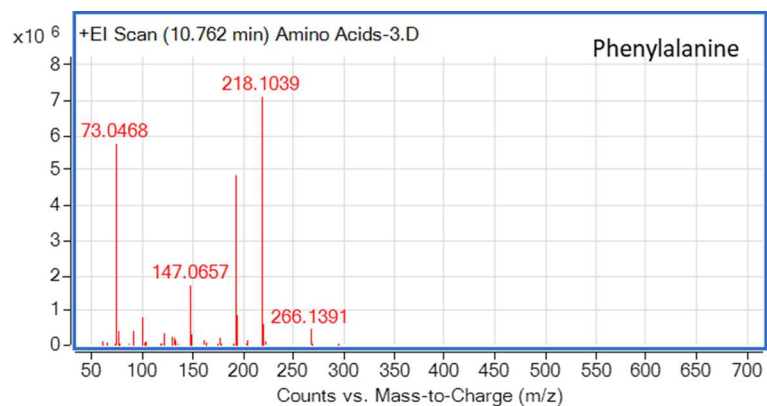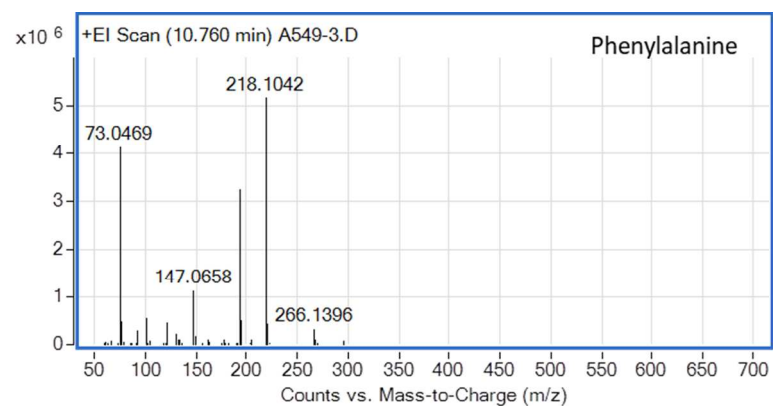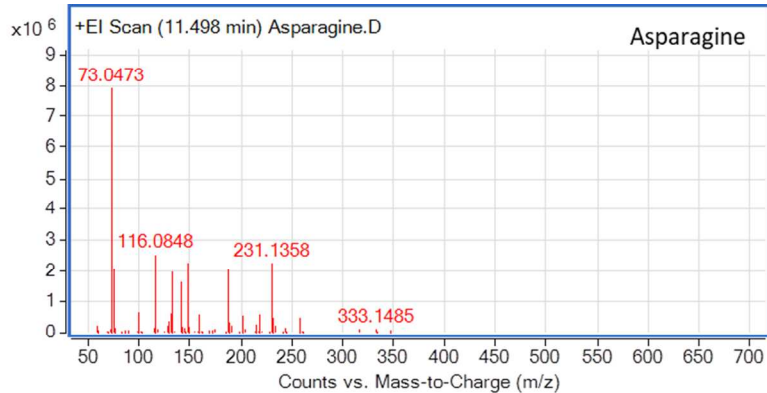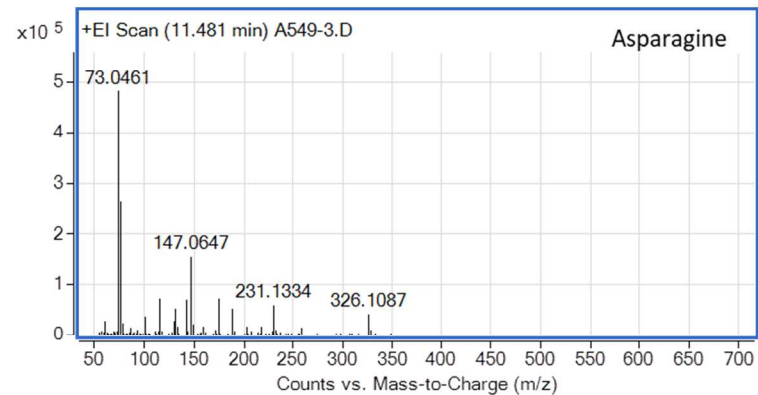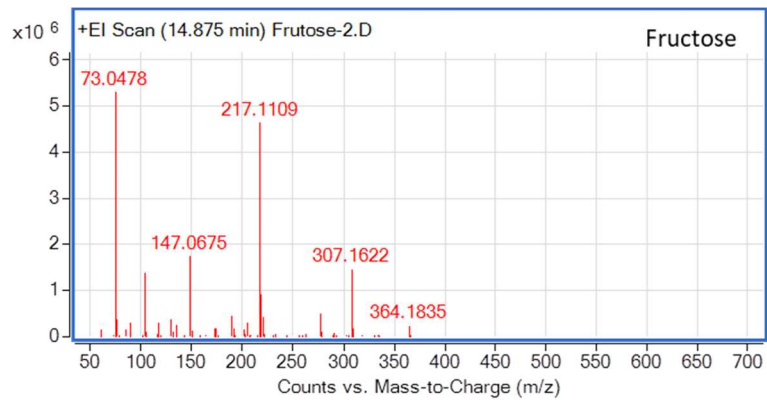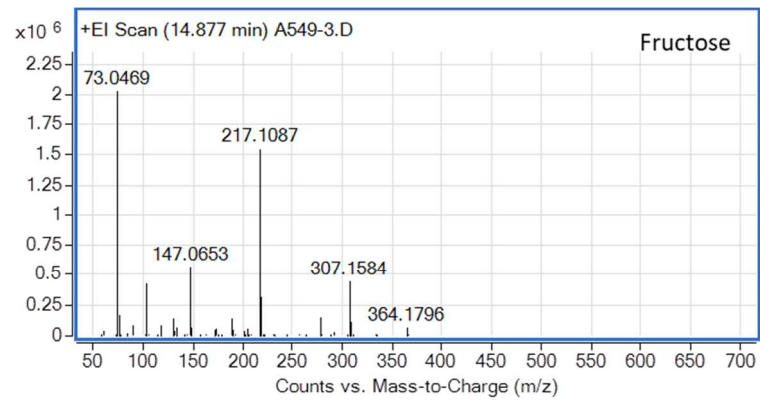

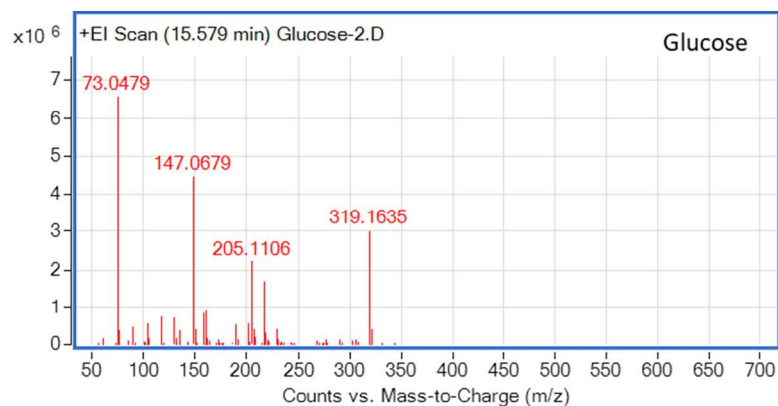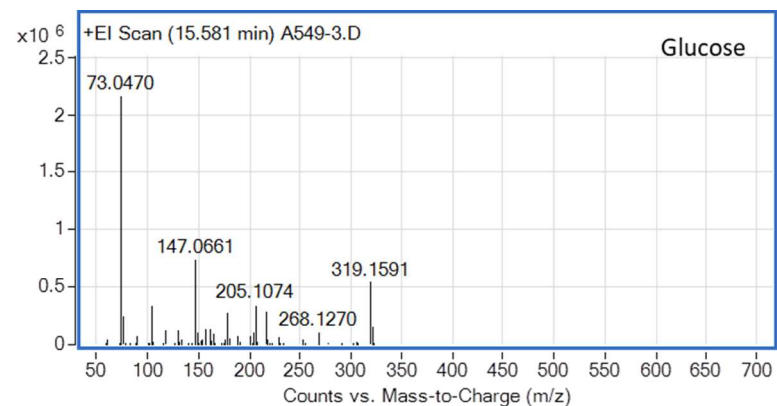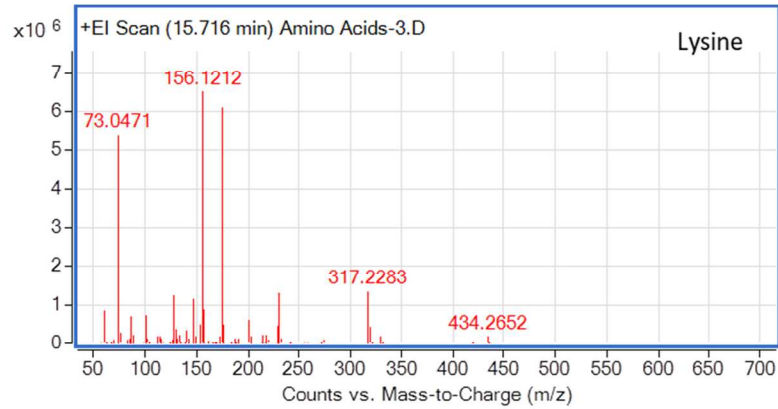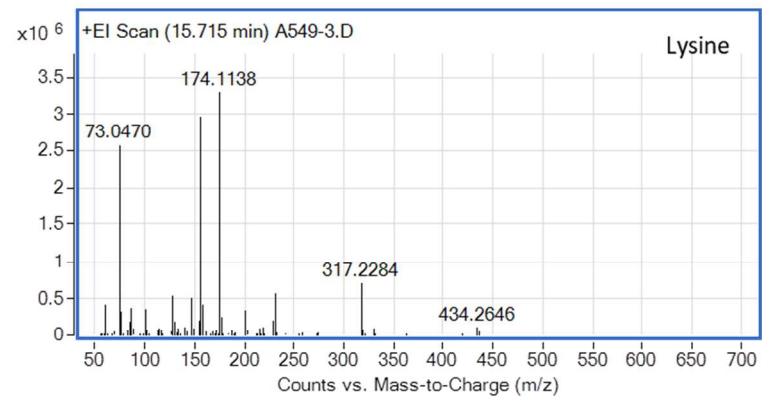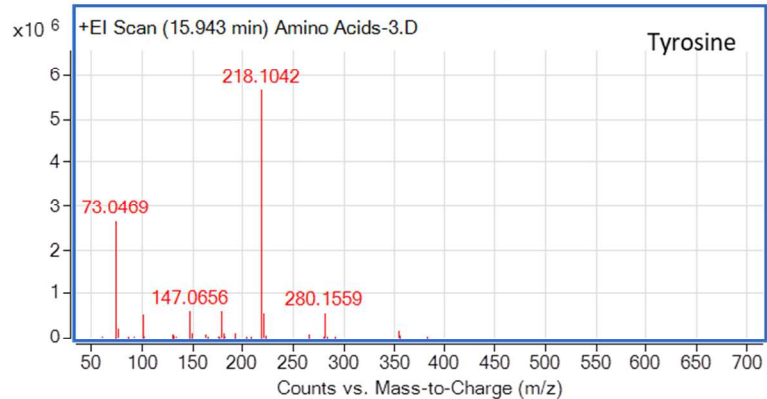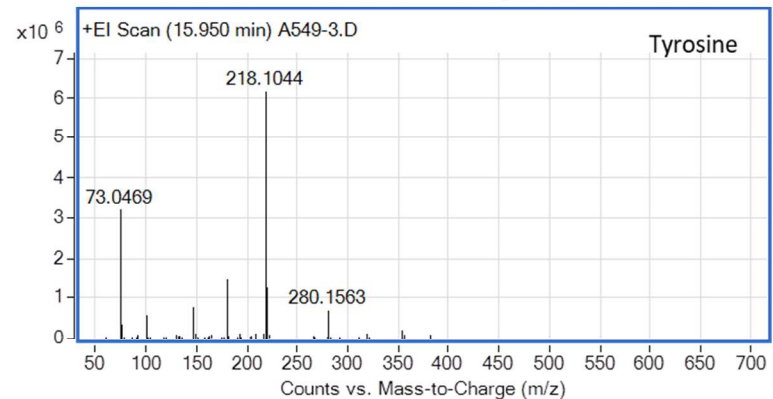

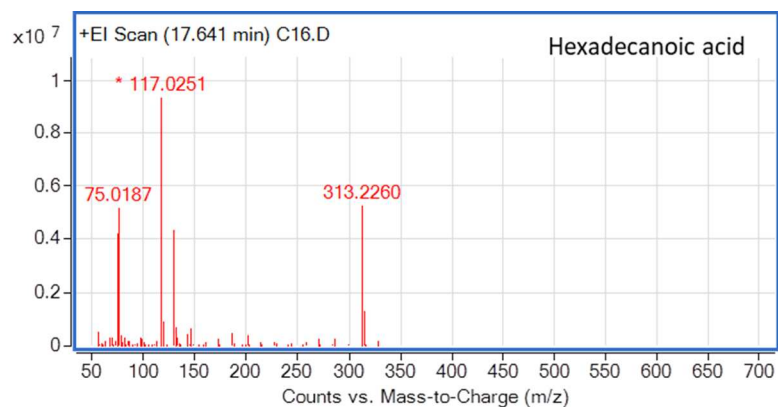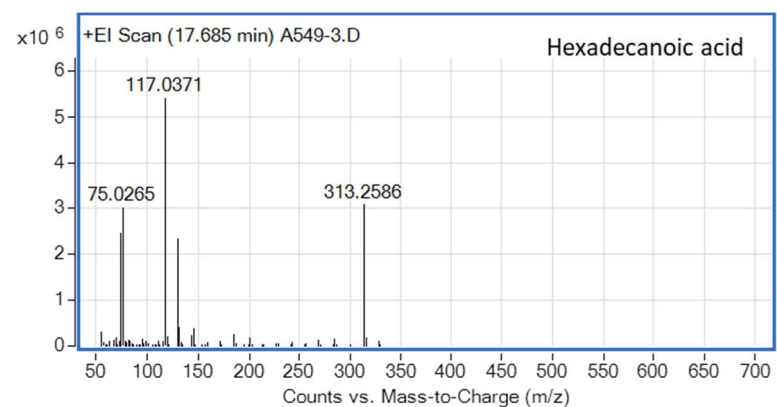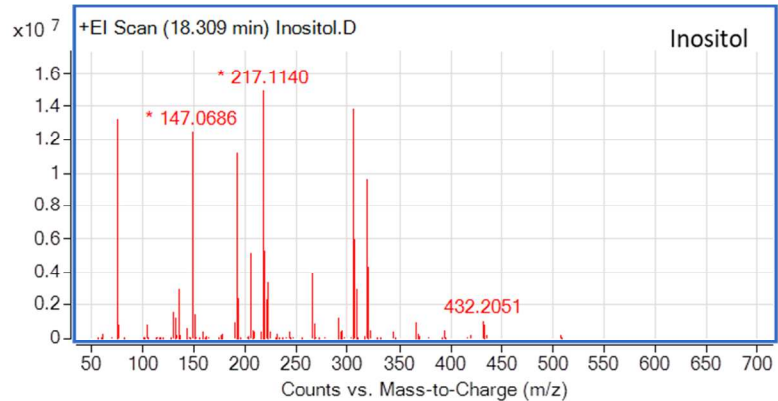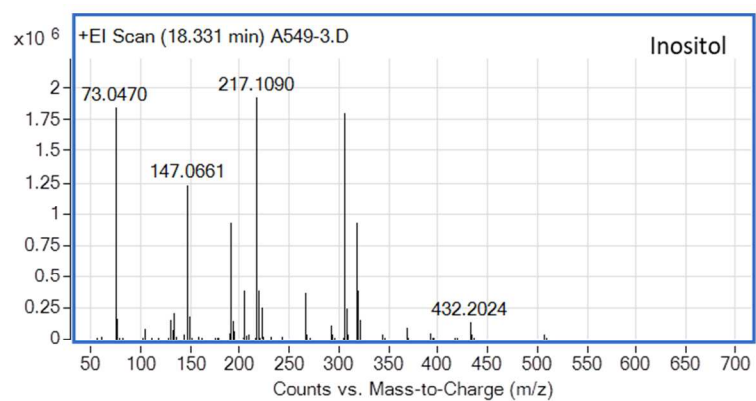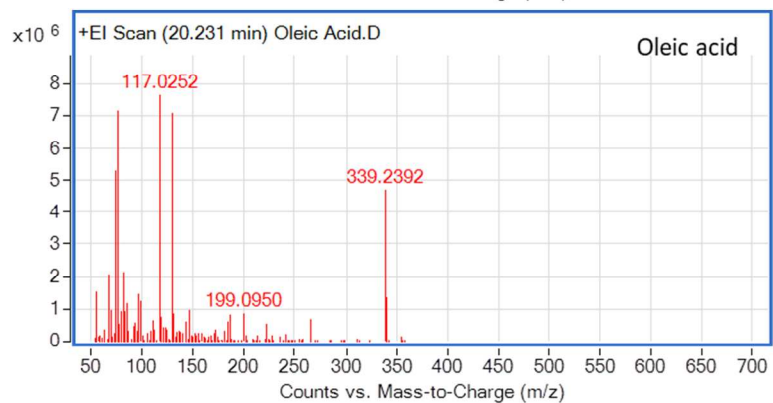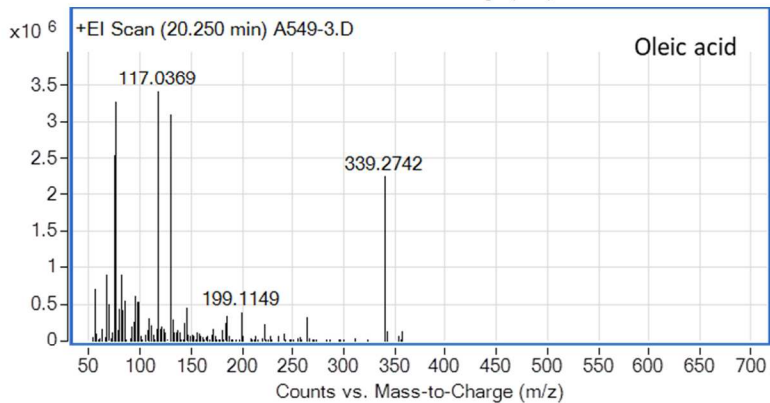



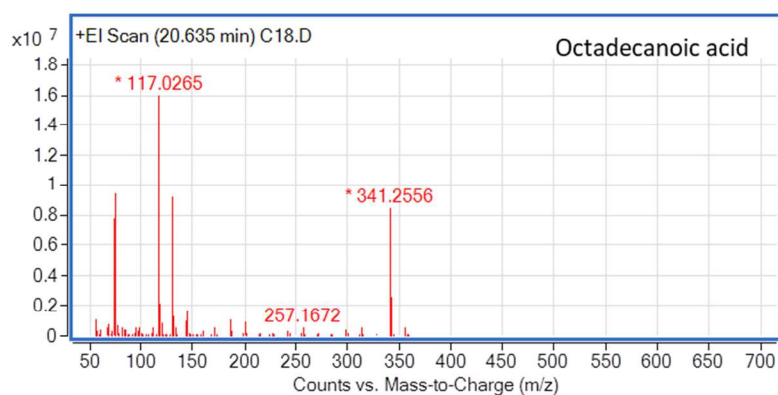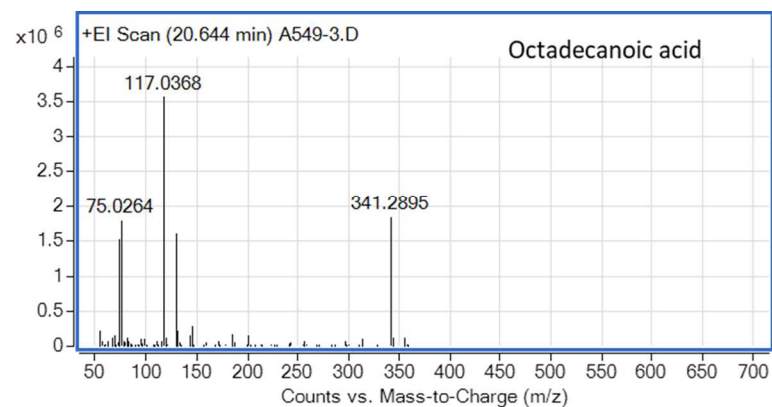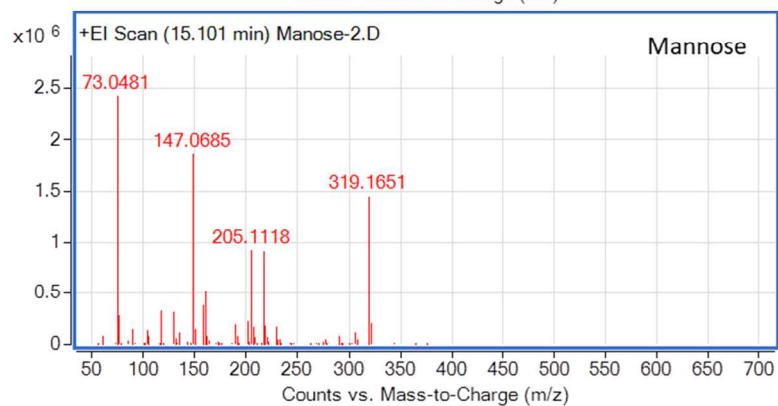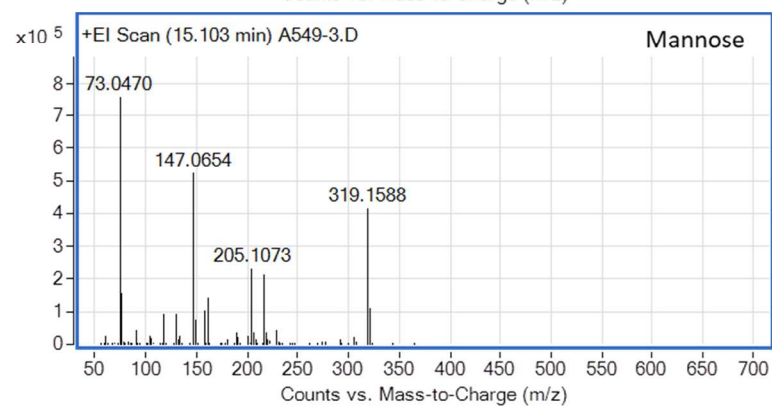

**Figure S7. Parallel comparison of spectrums of 20 non-volatile metabolites in sample and in standards. Spectrum of standard is in red, spectrum of sample is in black**



a)

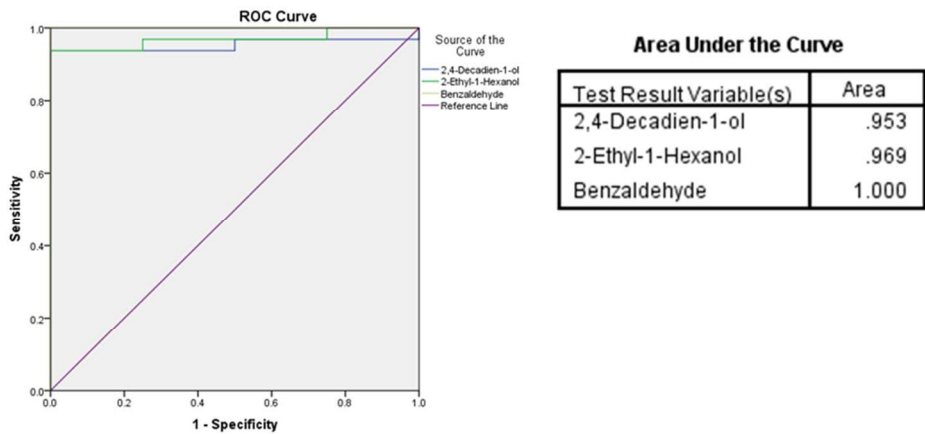

b)

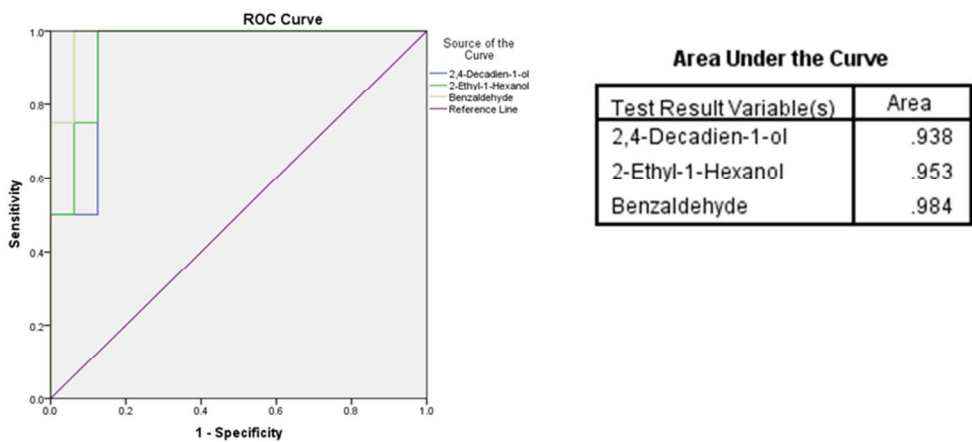

c)

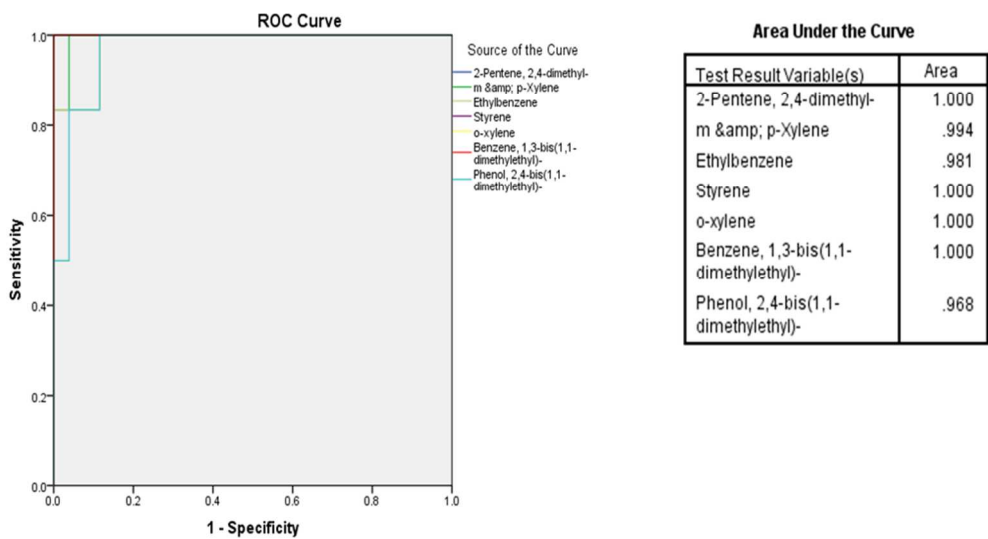

Figure S8. ROC analysis of a) cancer vs normal cell b) large cell vs. other NSCLC. c) SCLC vs NSCLC
